# Supplementary figures and images for: Rapid, Reference-Free human genotype imputation with denoising autoencoders
Source: eLife journal article supplement (doi:10.7554/elife.75600), 2022-09-23

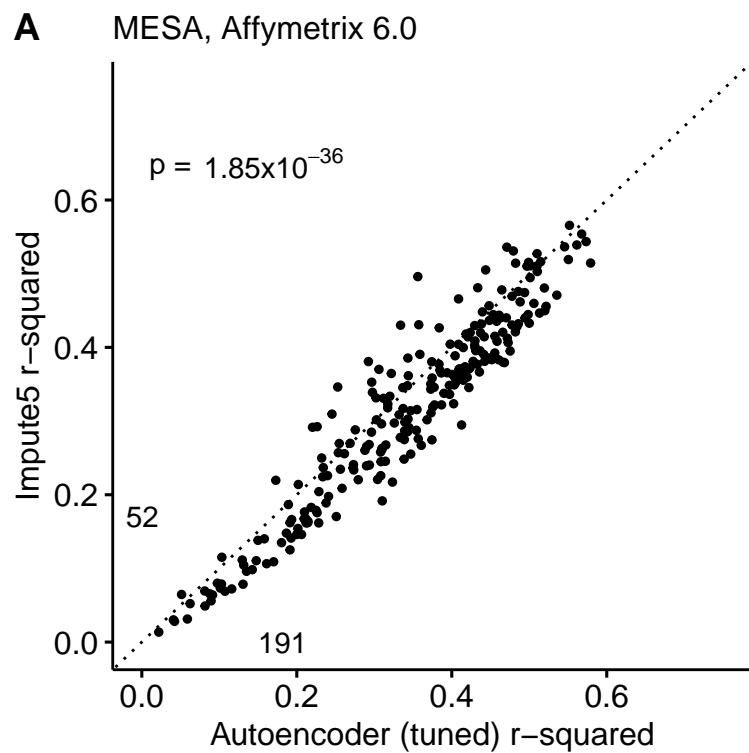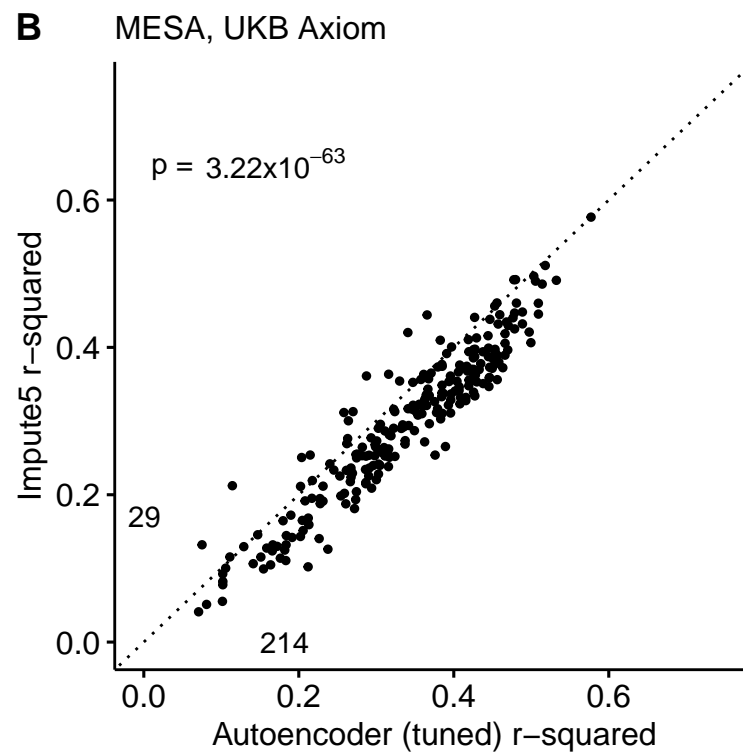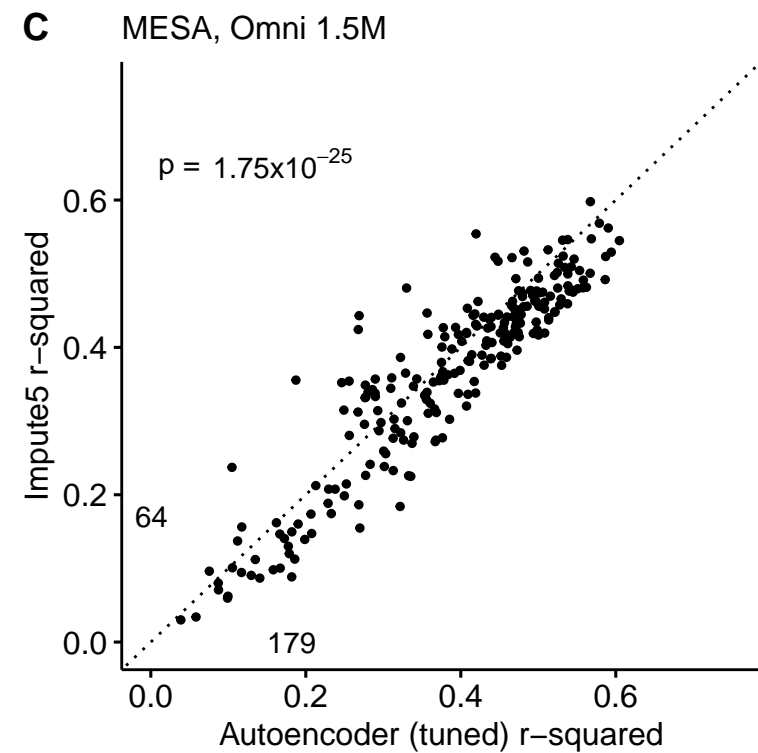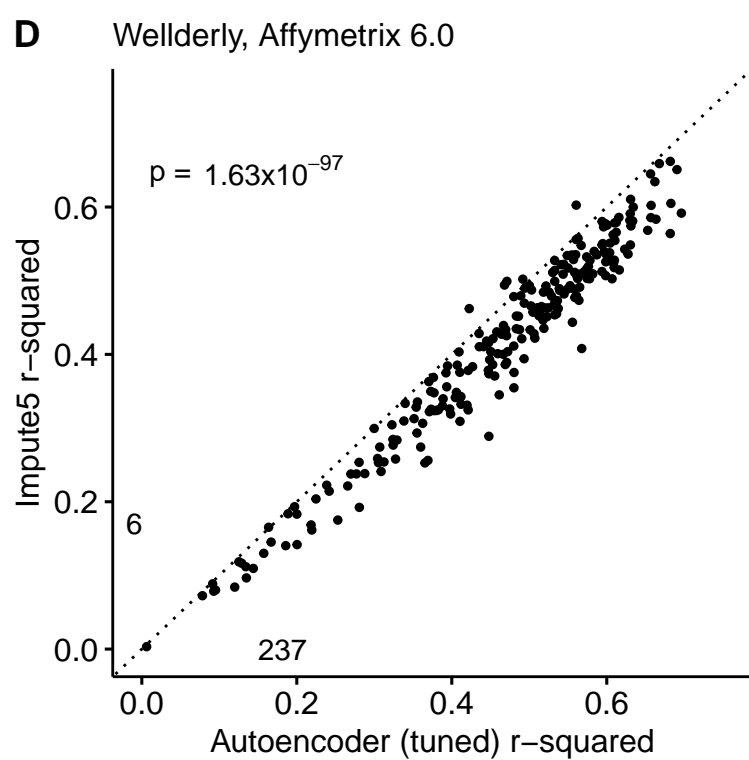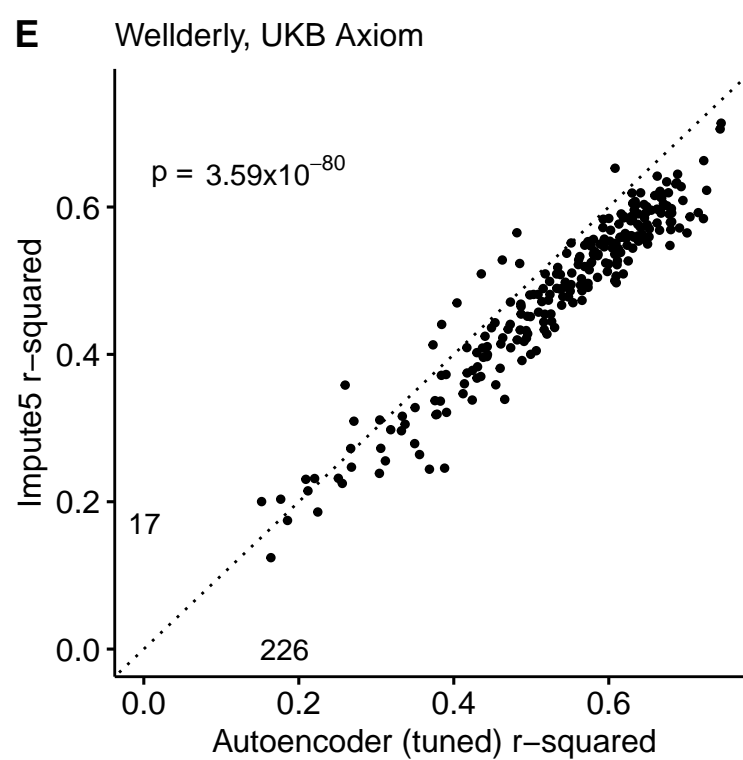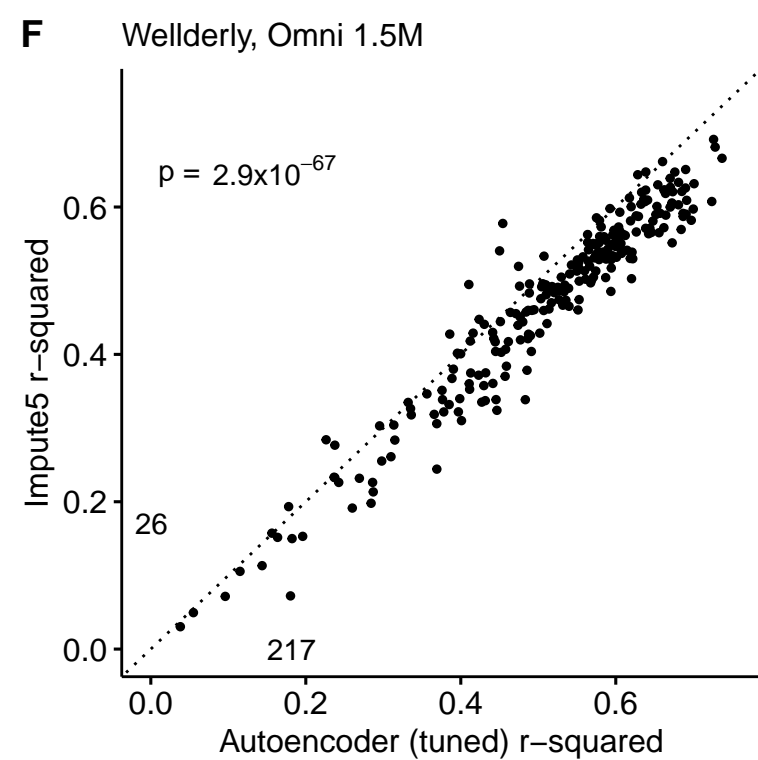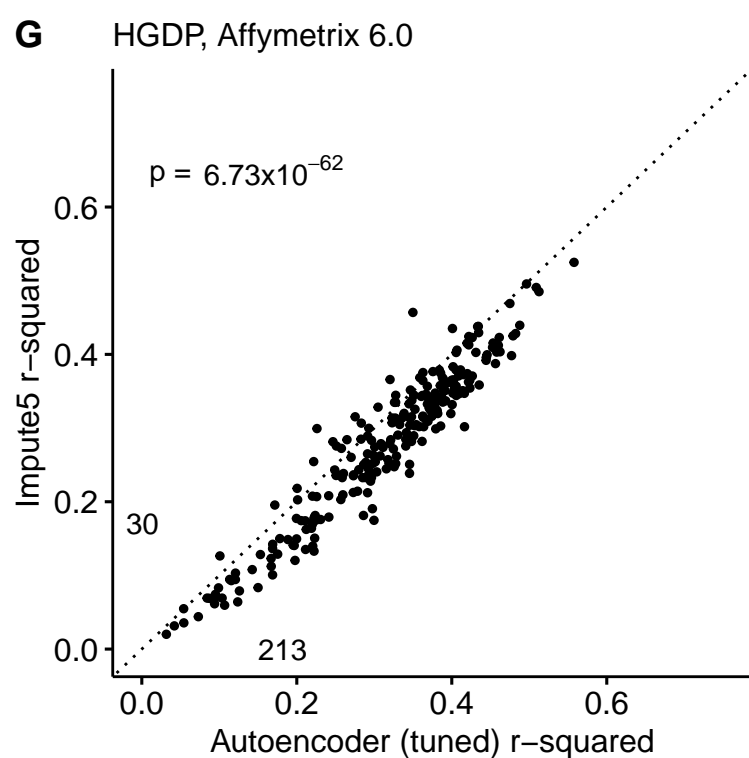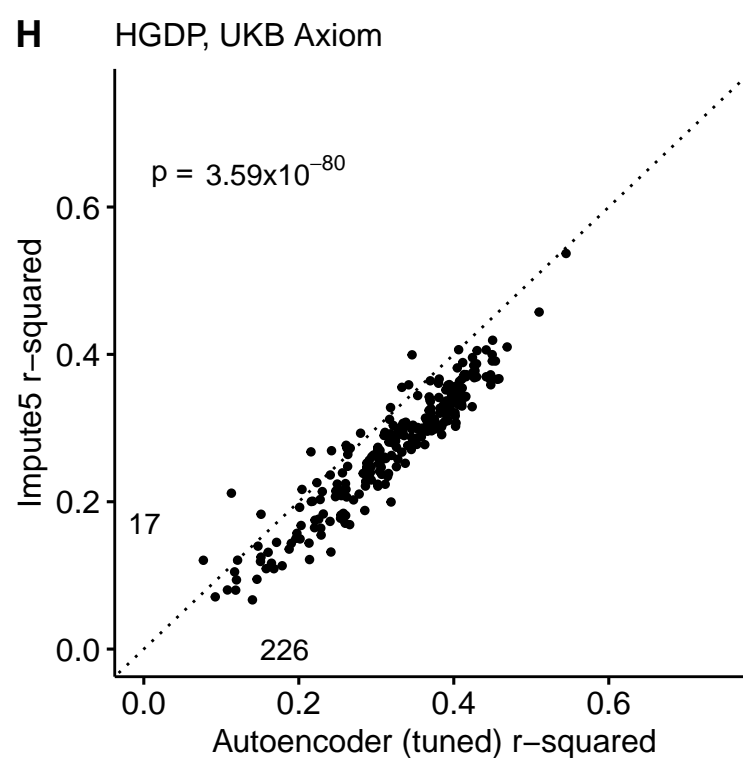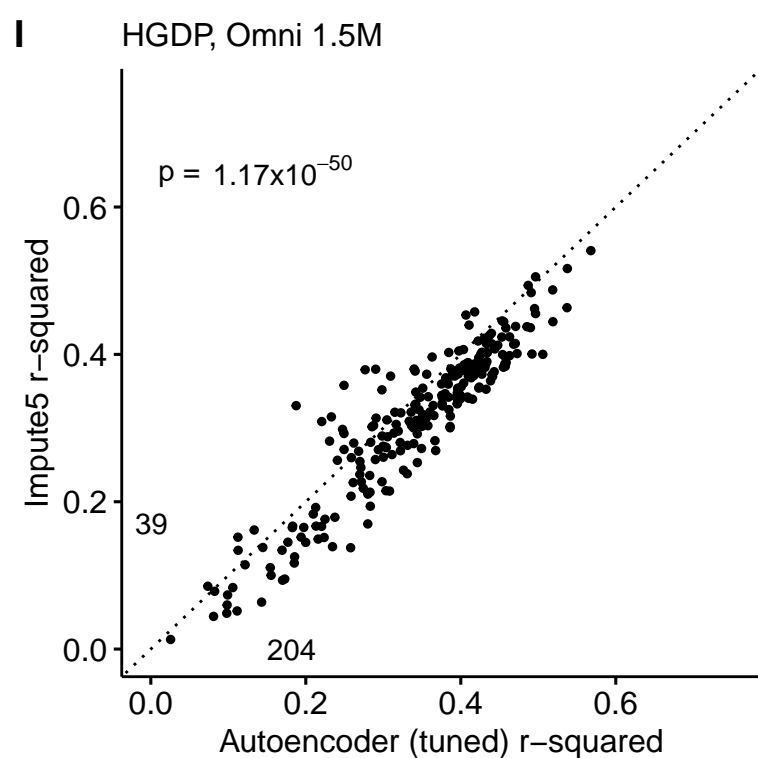

Supplement: supp [file elife-75600-supp-v1.zip]

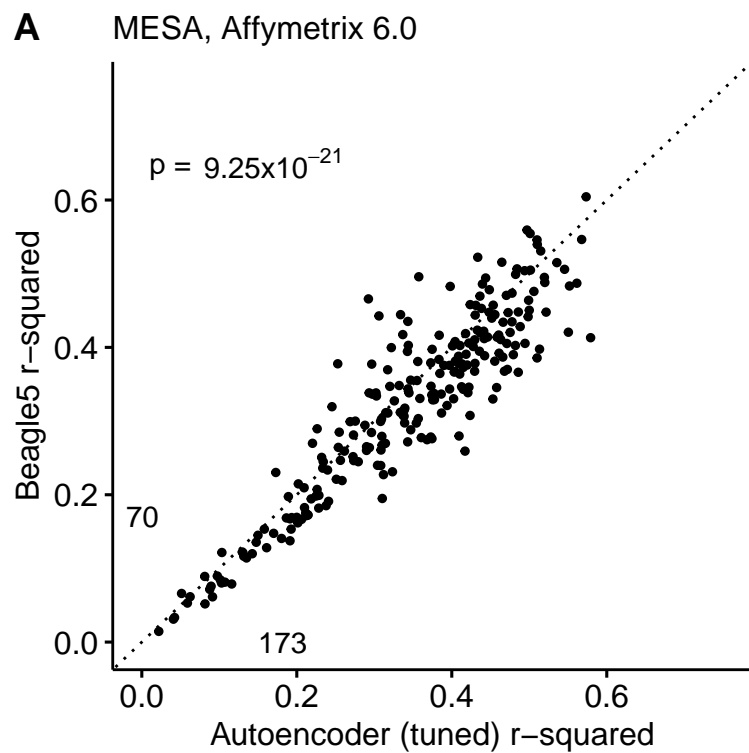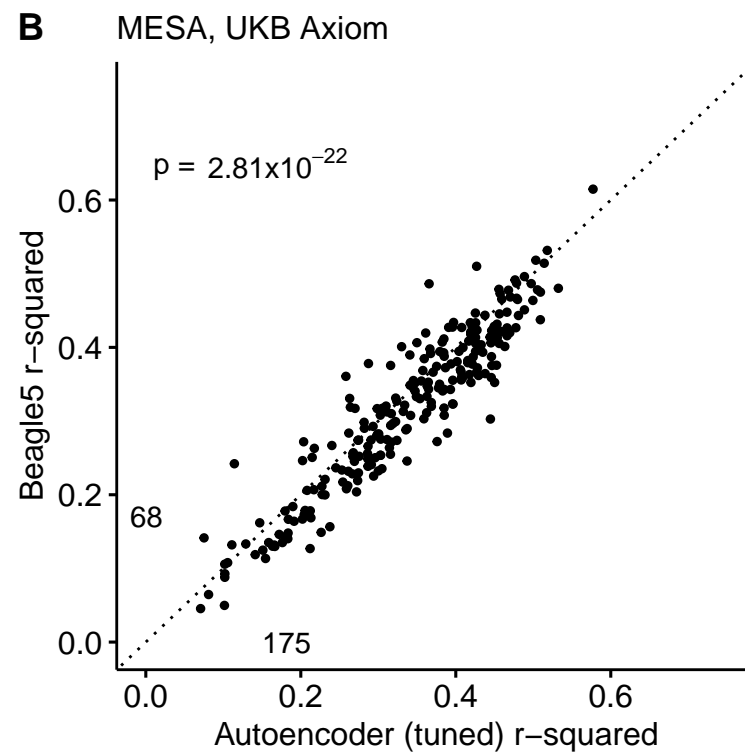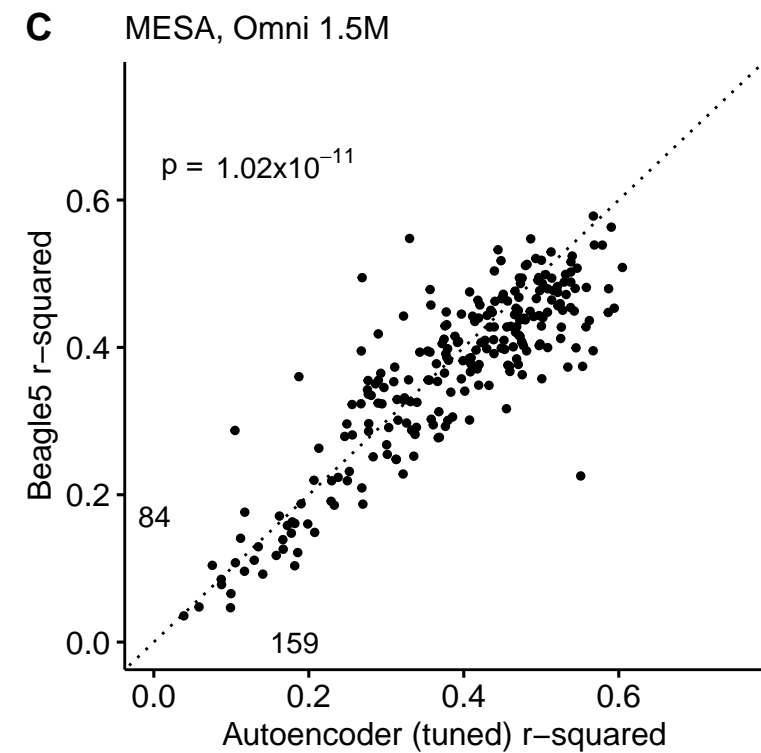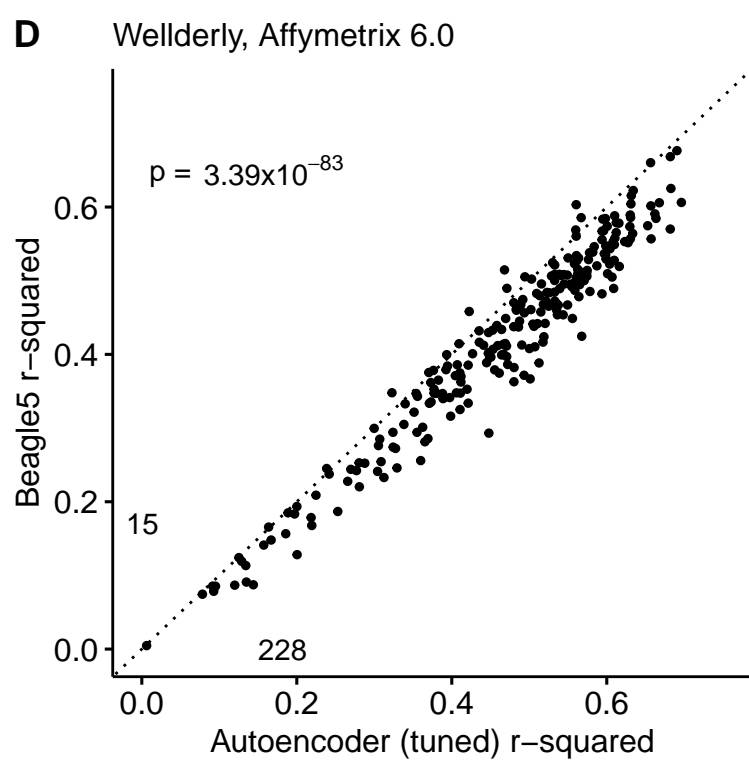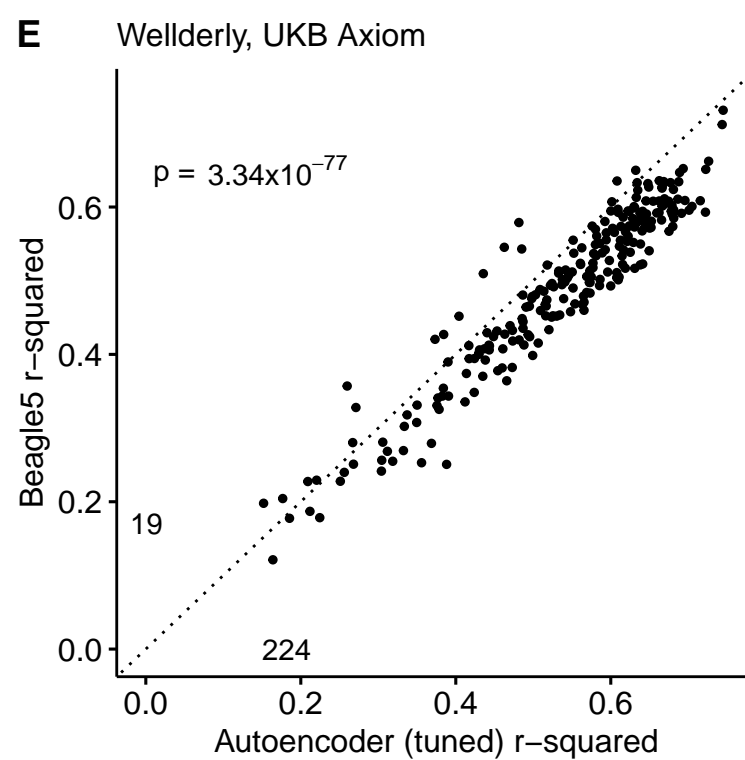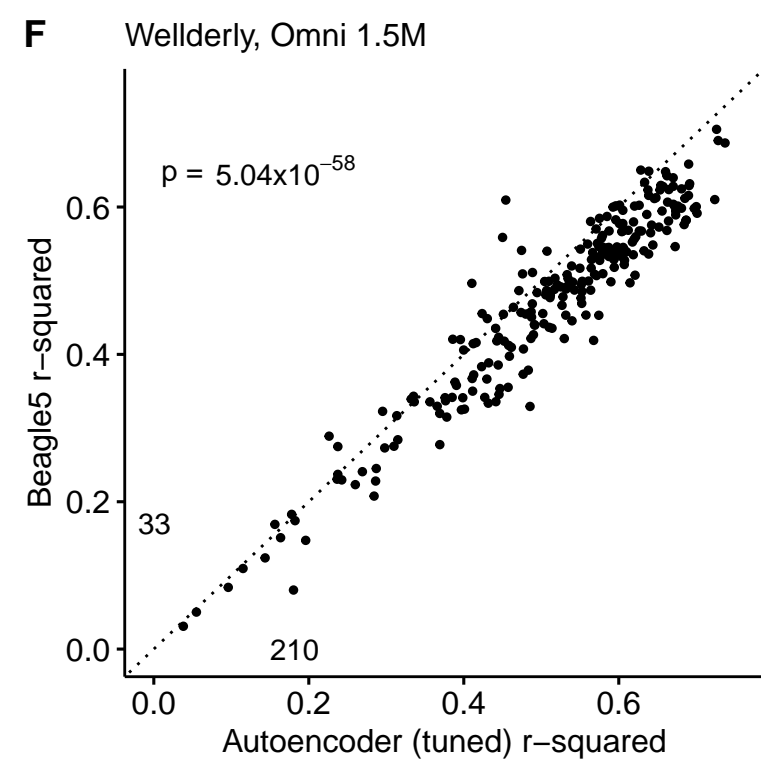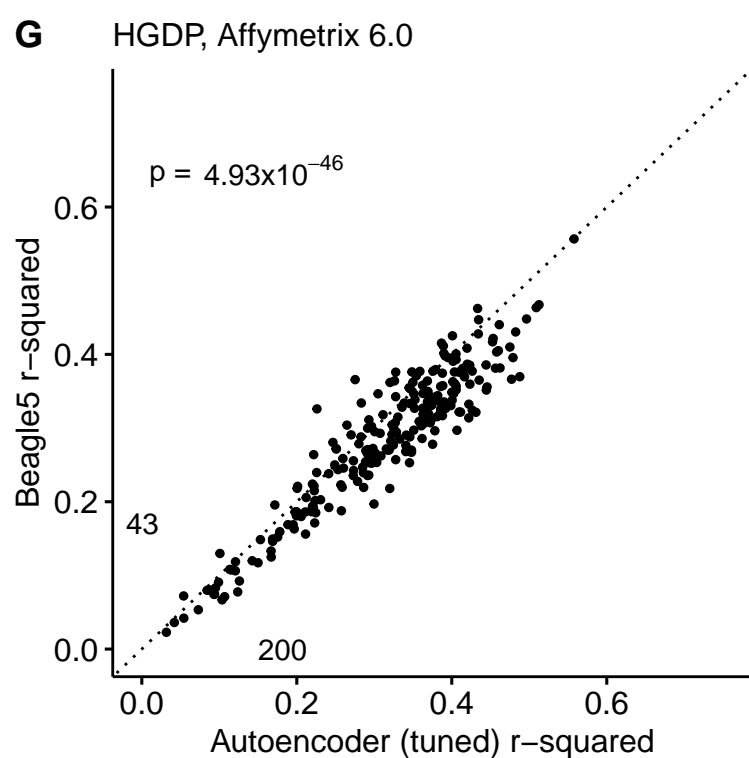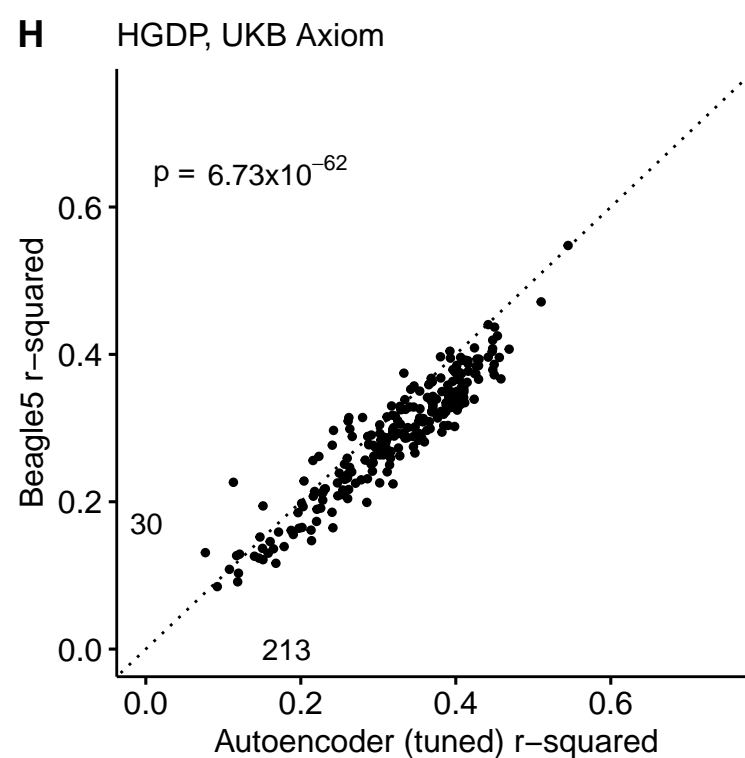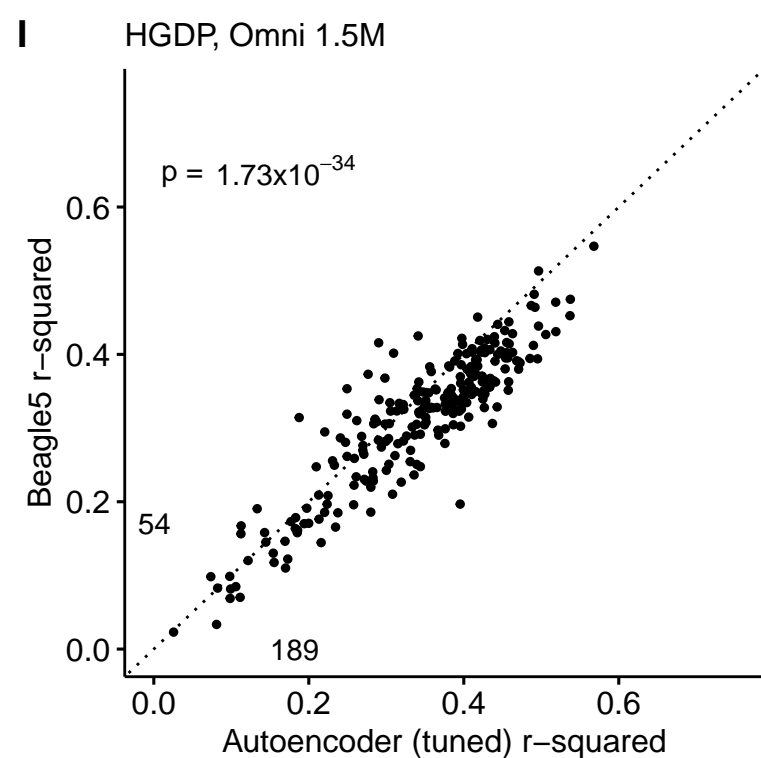

Supplement: supp [file elife-75600-supp-v1.zip]

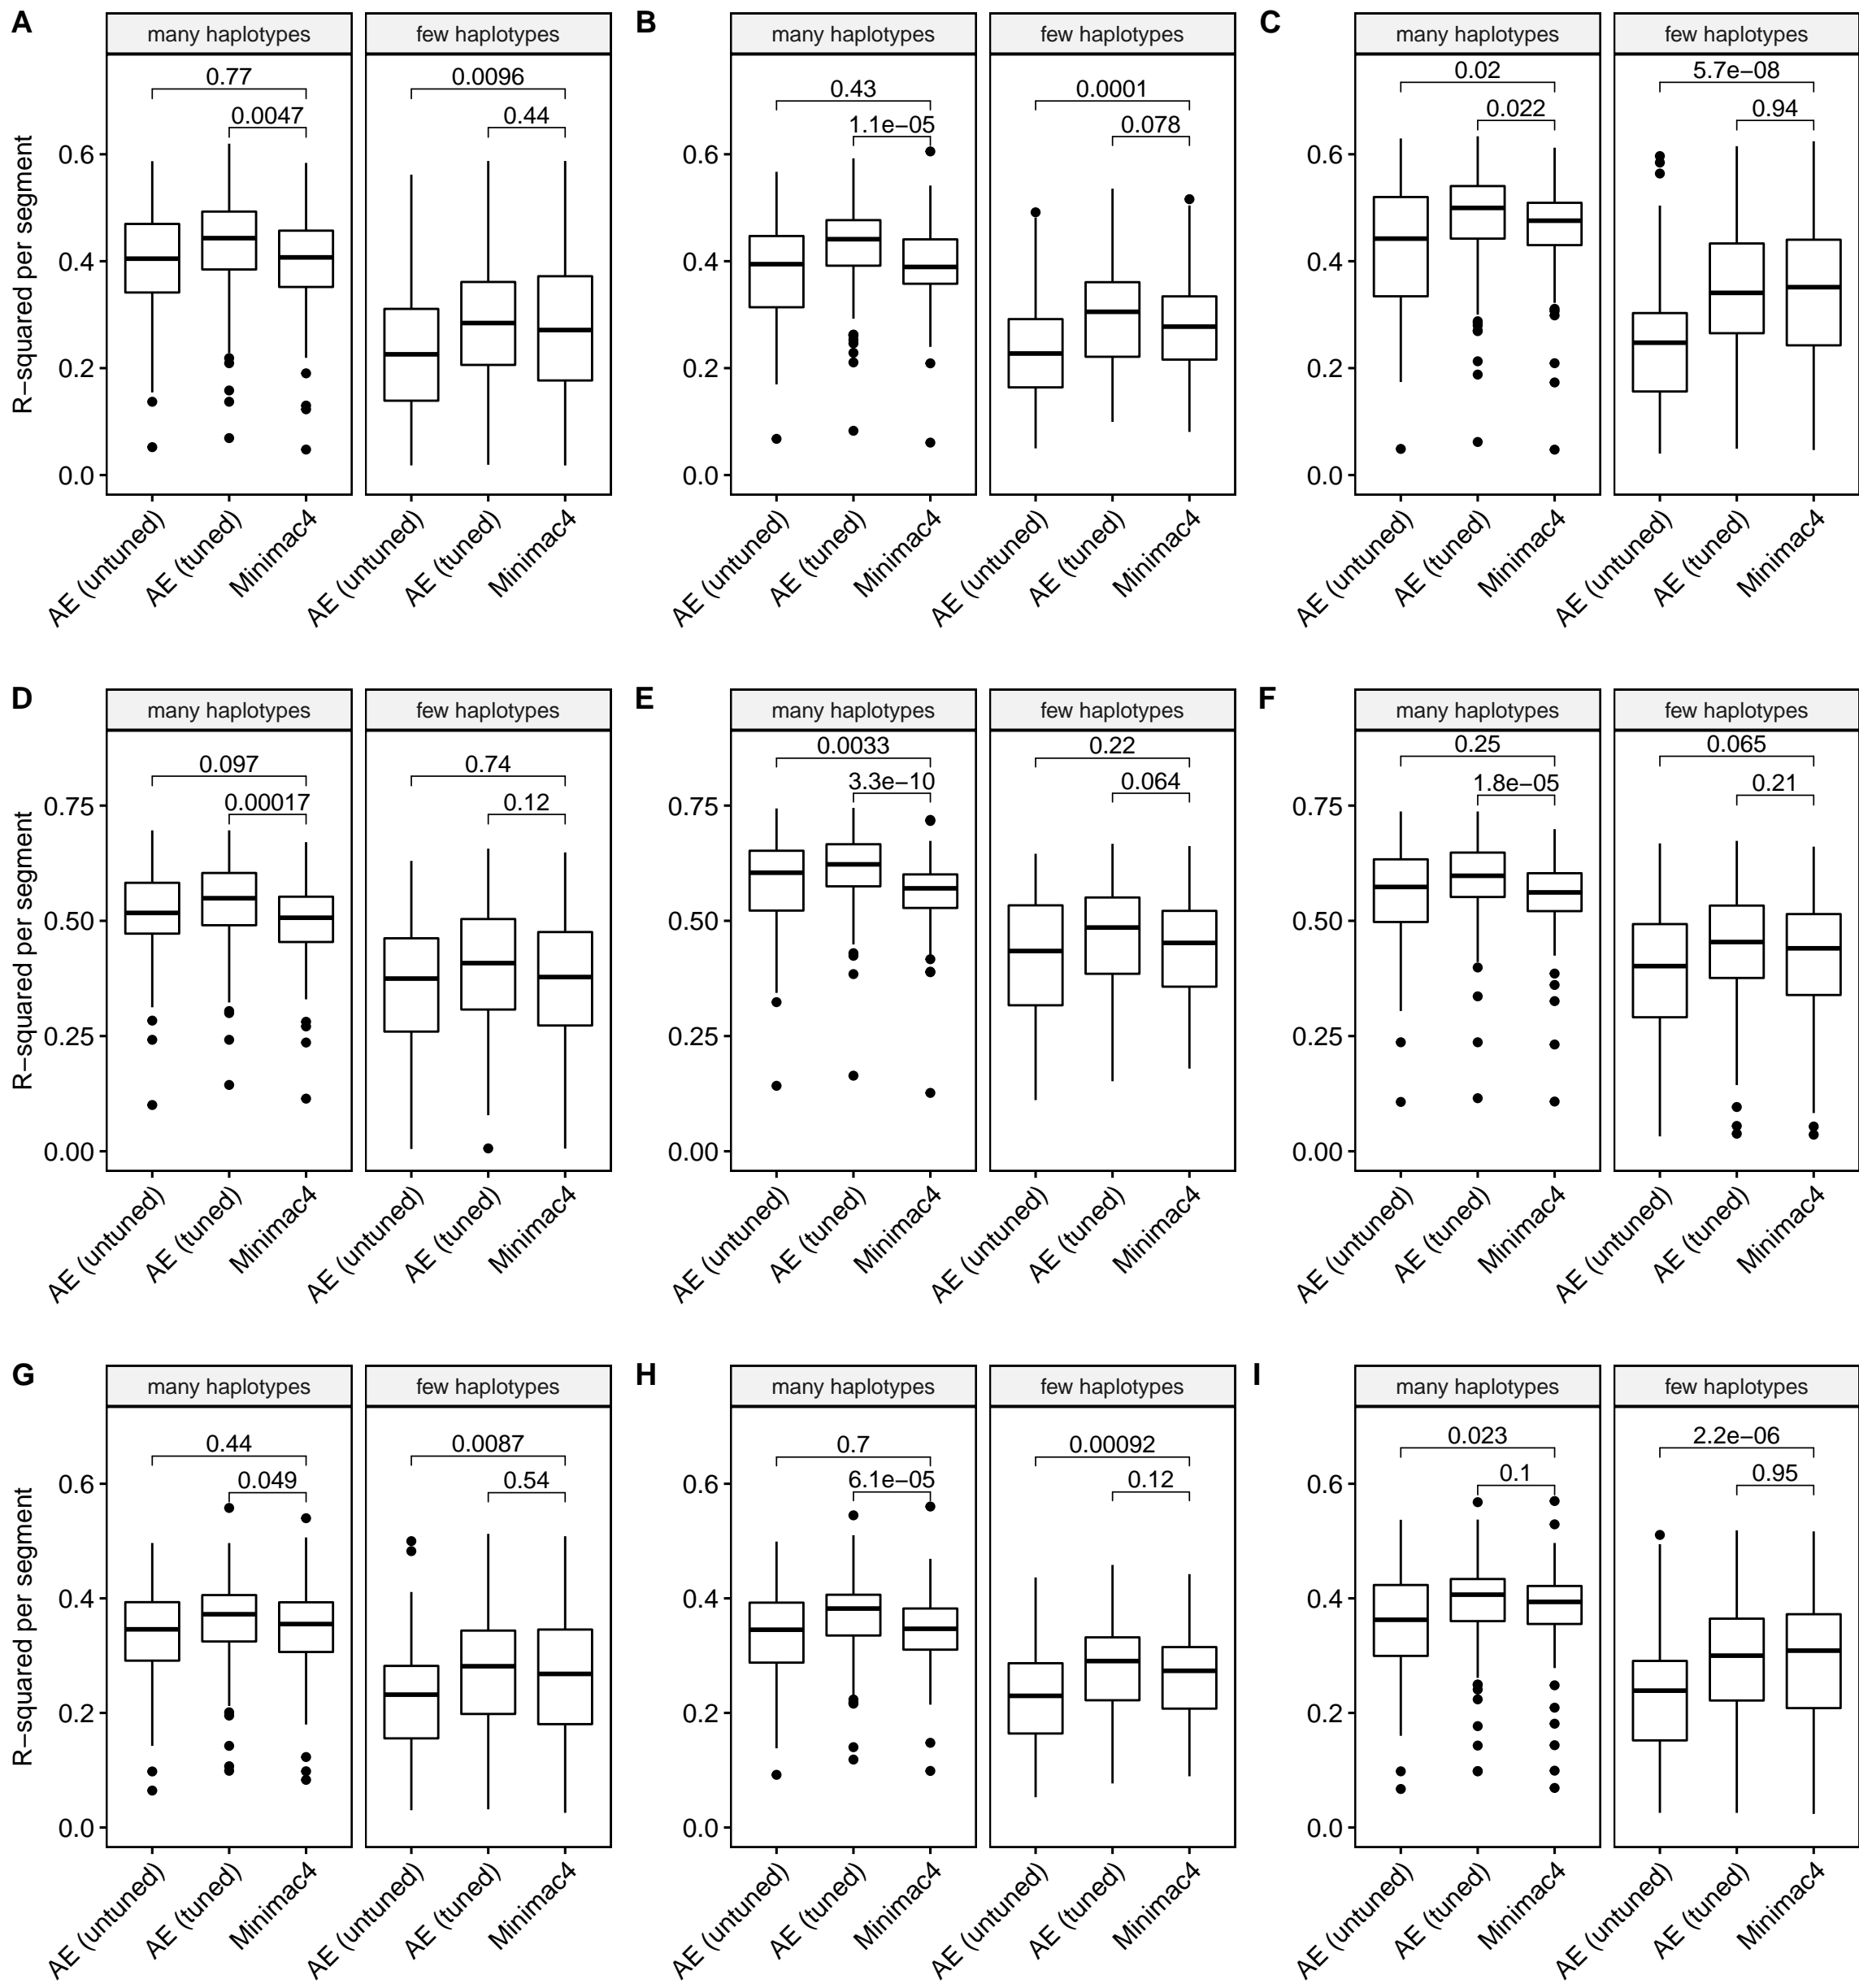

Supplement: supp [file elife-75600-supp-v1.zip]

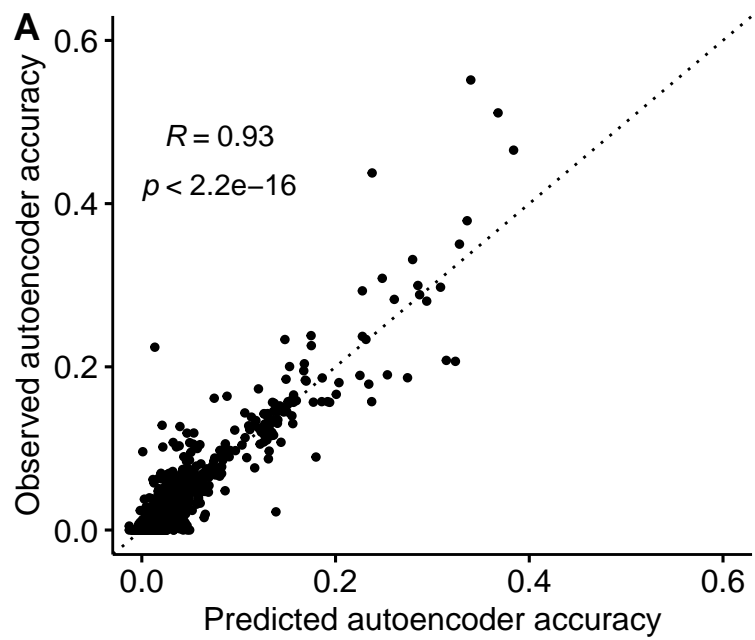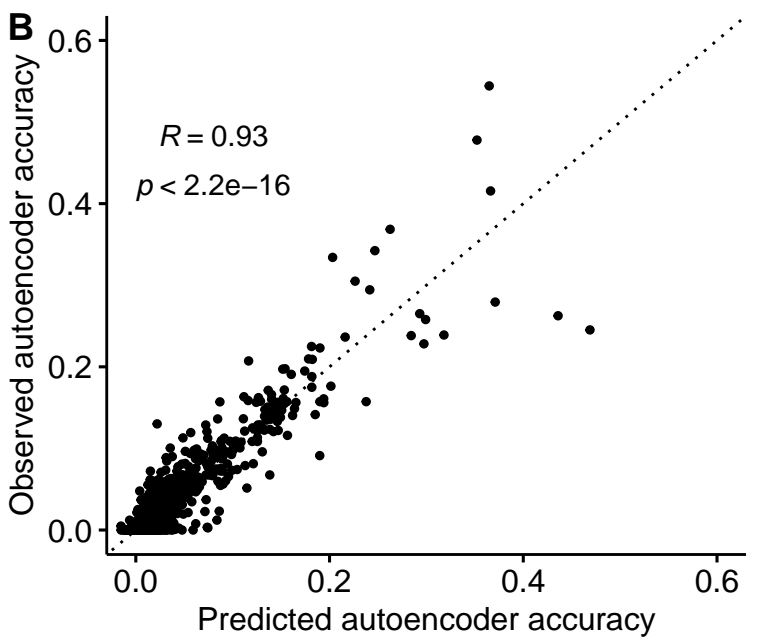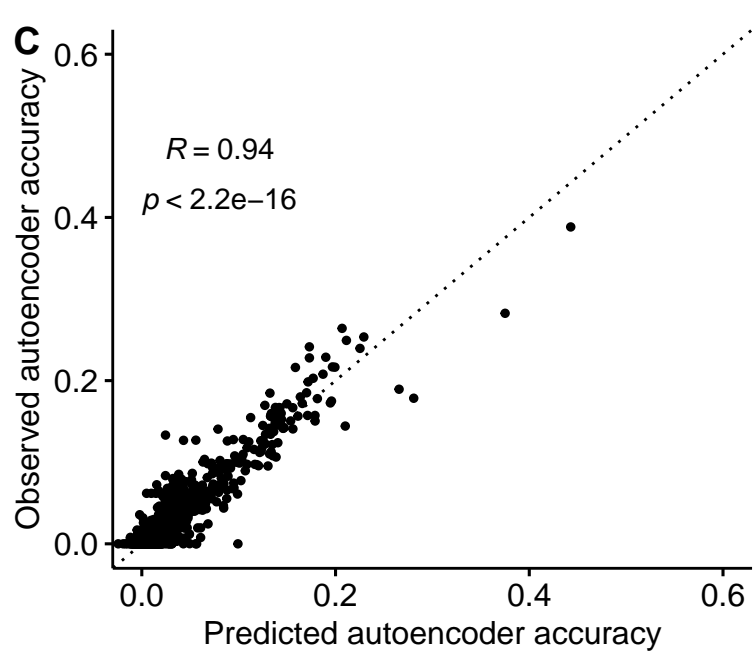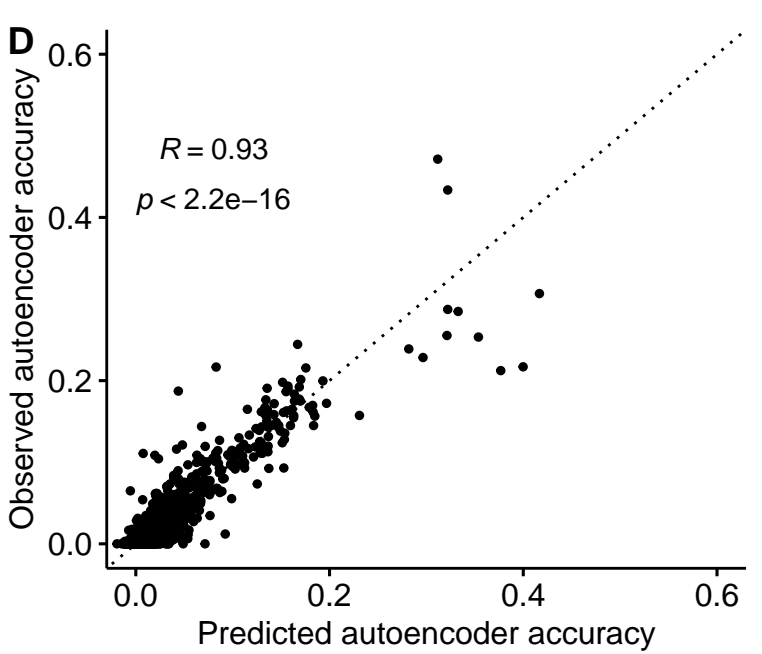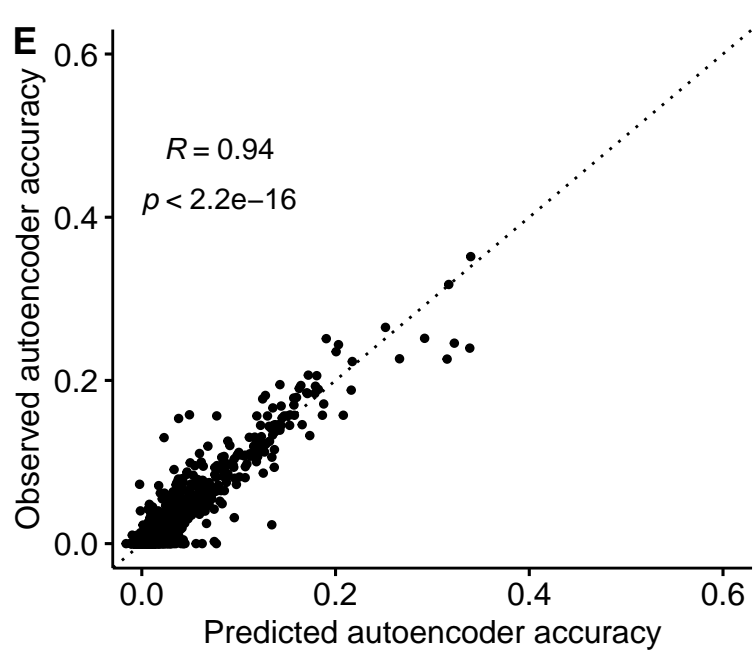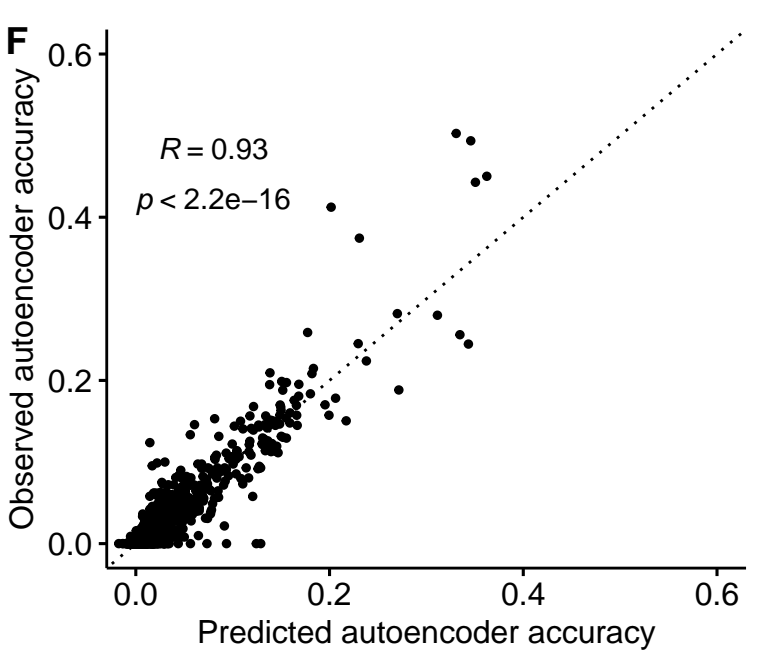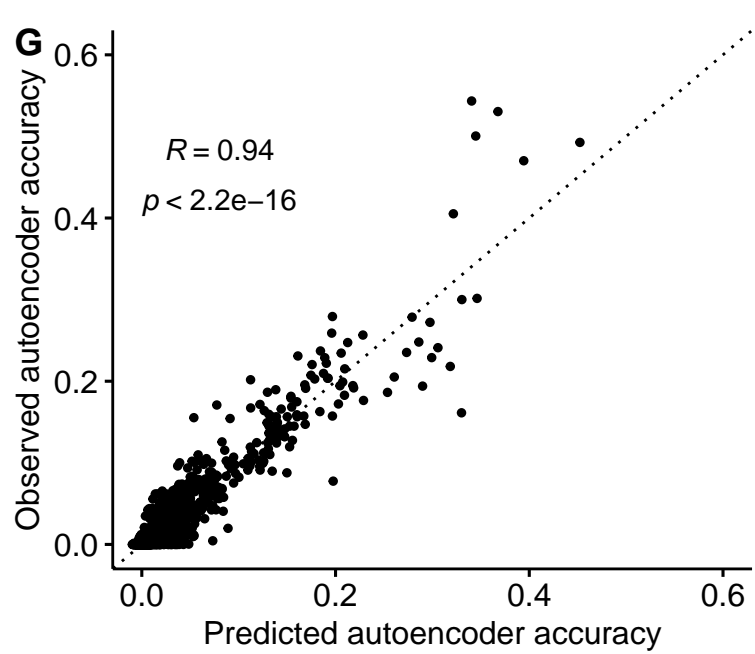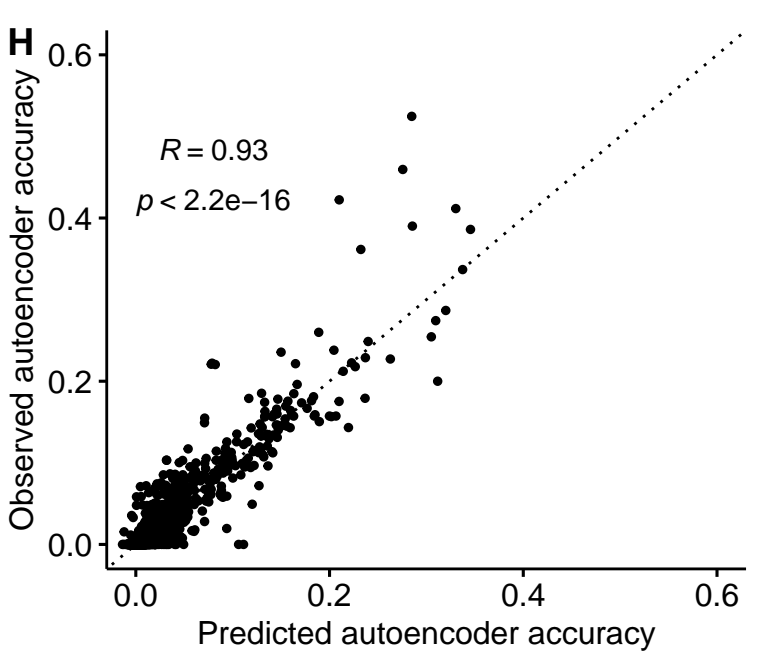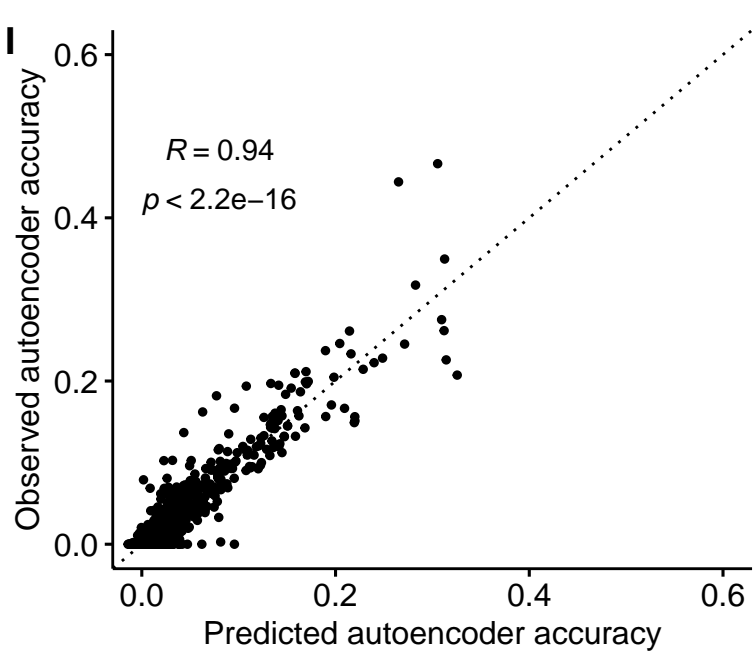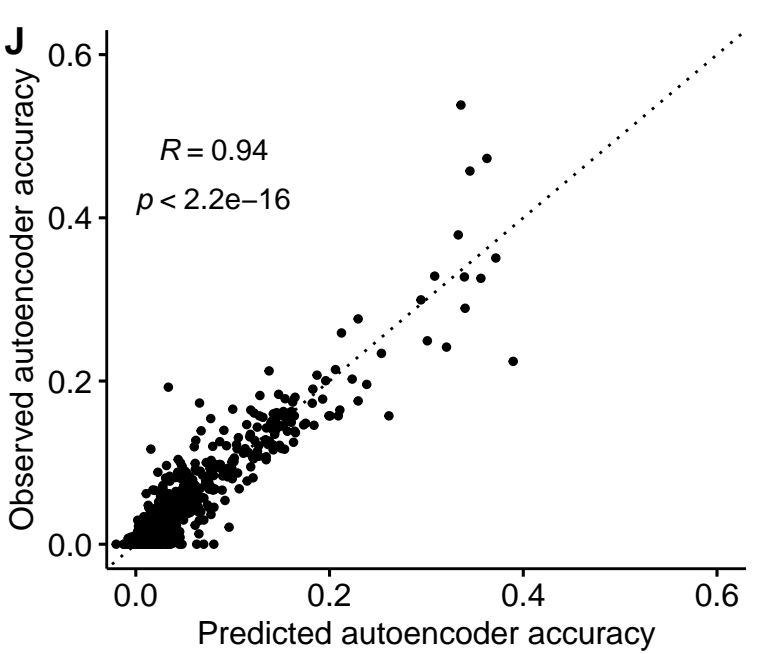

Supplement: supp [file elife-75600-supp-v1.zip]

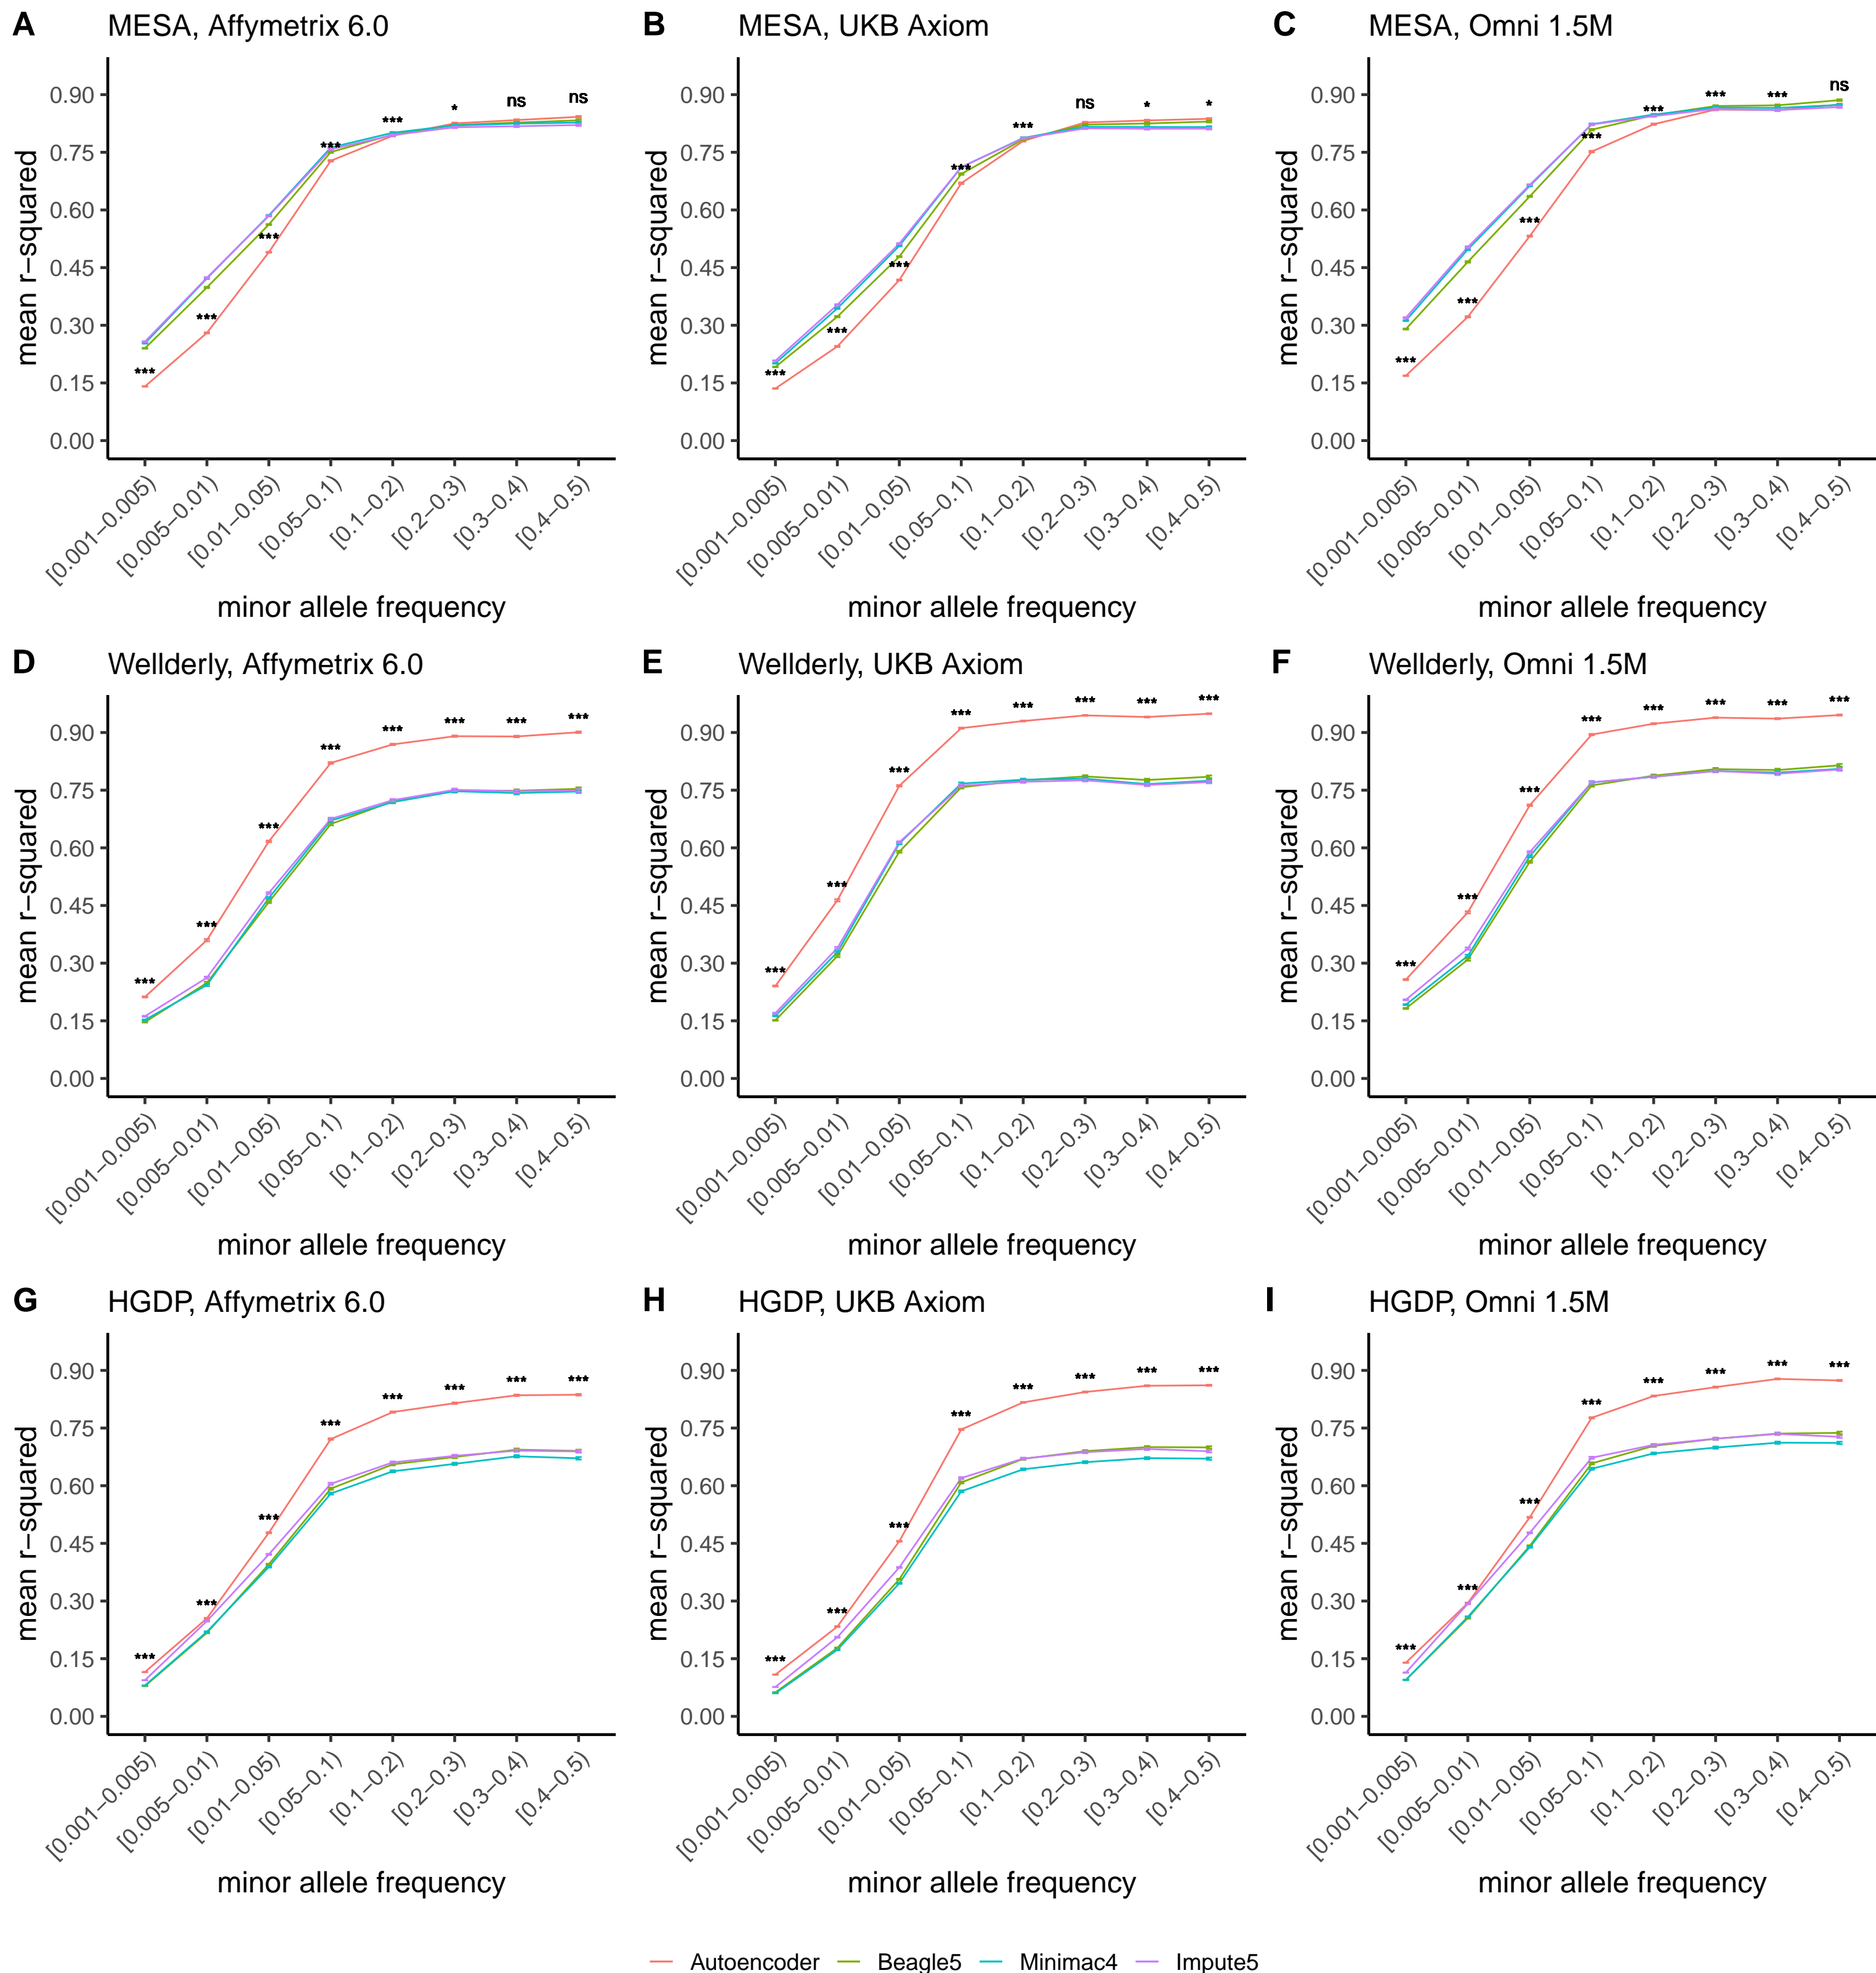

Supplement: supp [file elife-75600-supp-v1.zip]

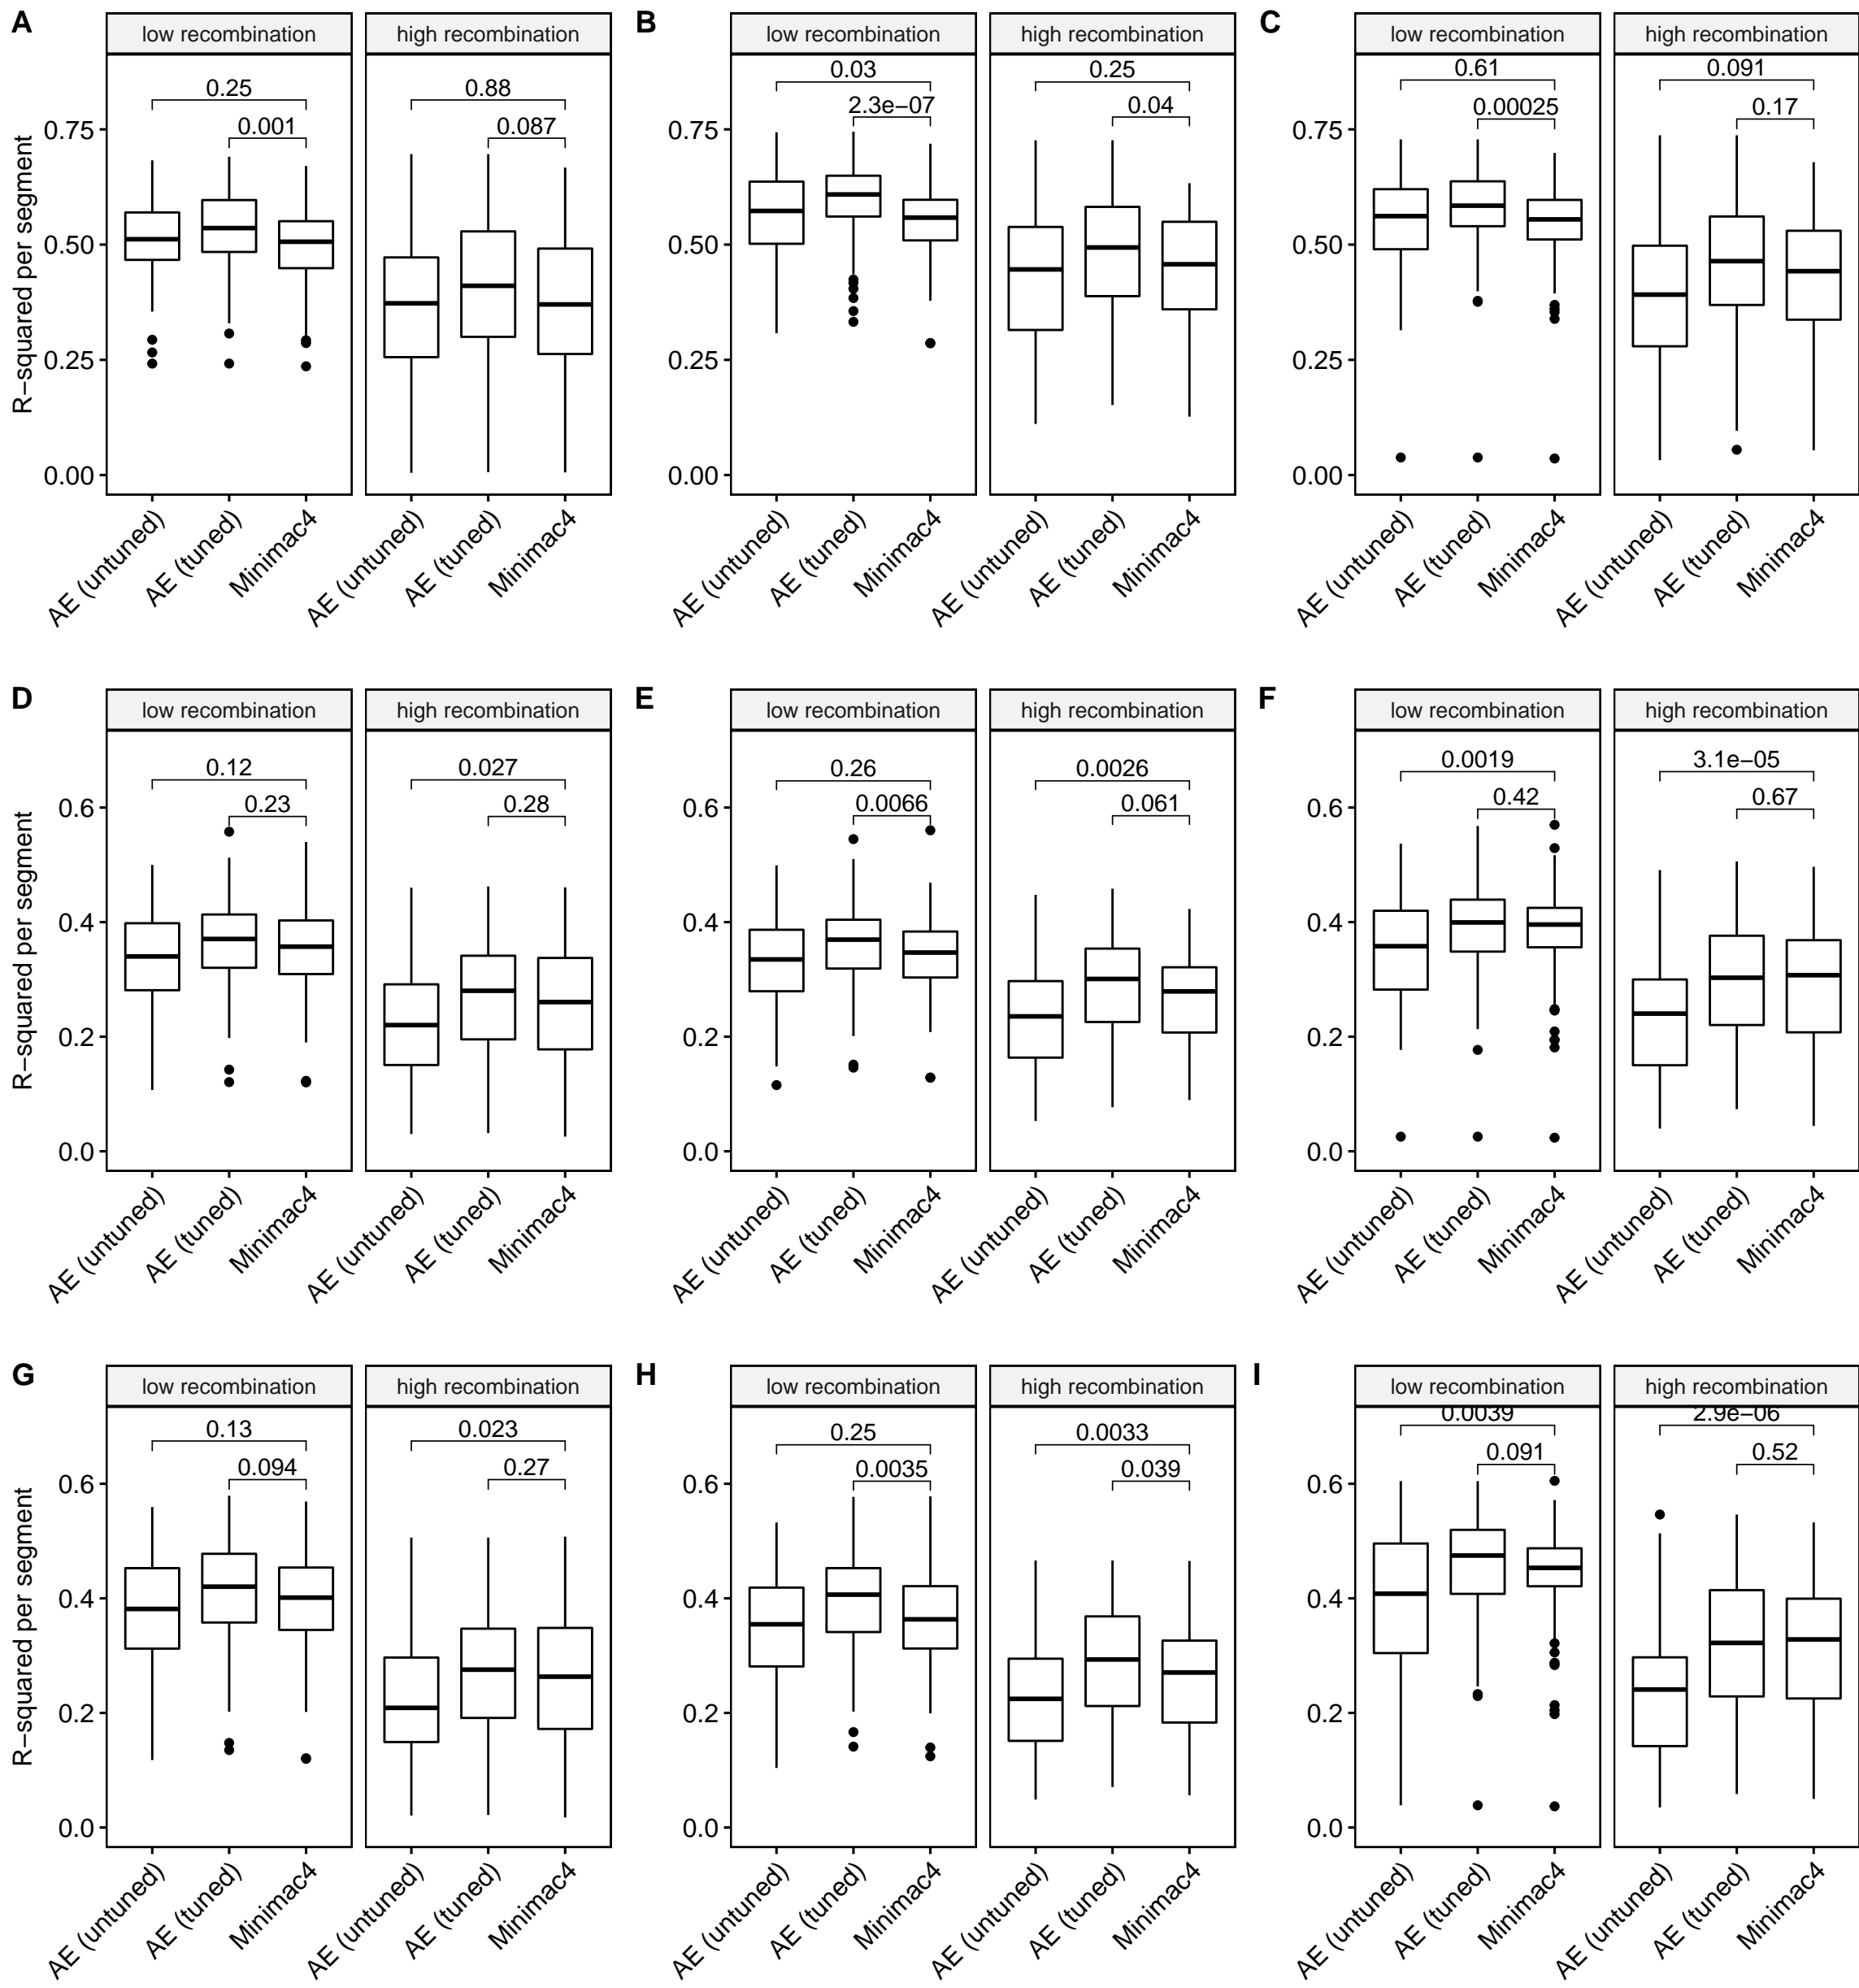

Supplement: supp [file elife-75600-supp-v1.zip]

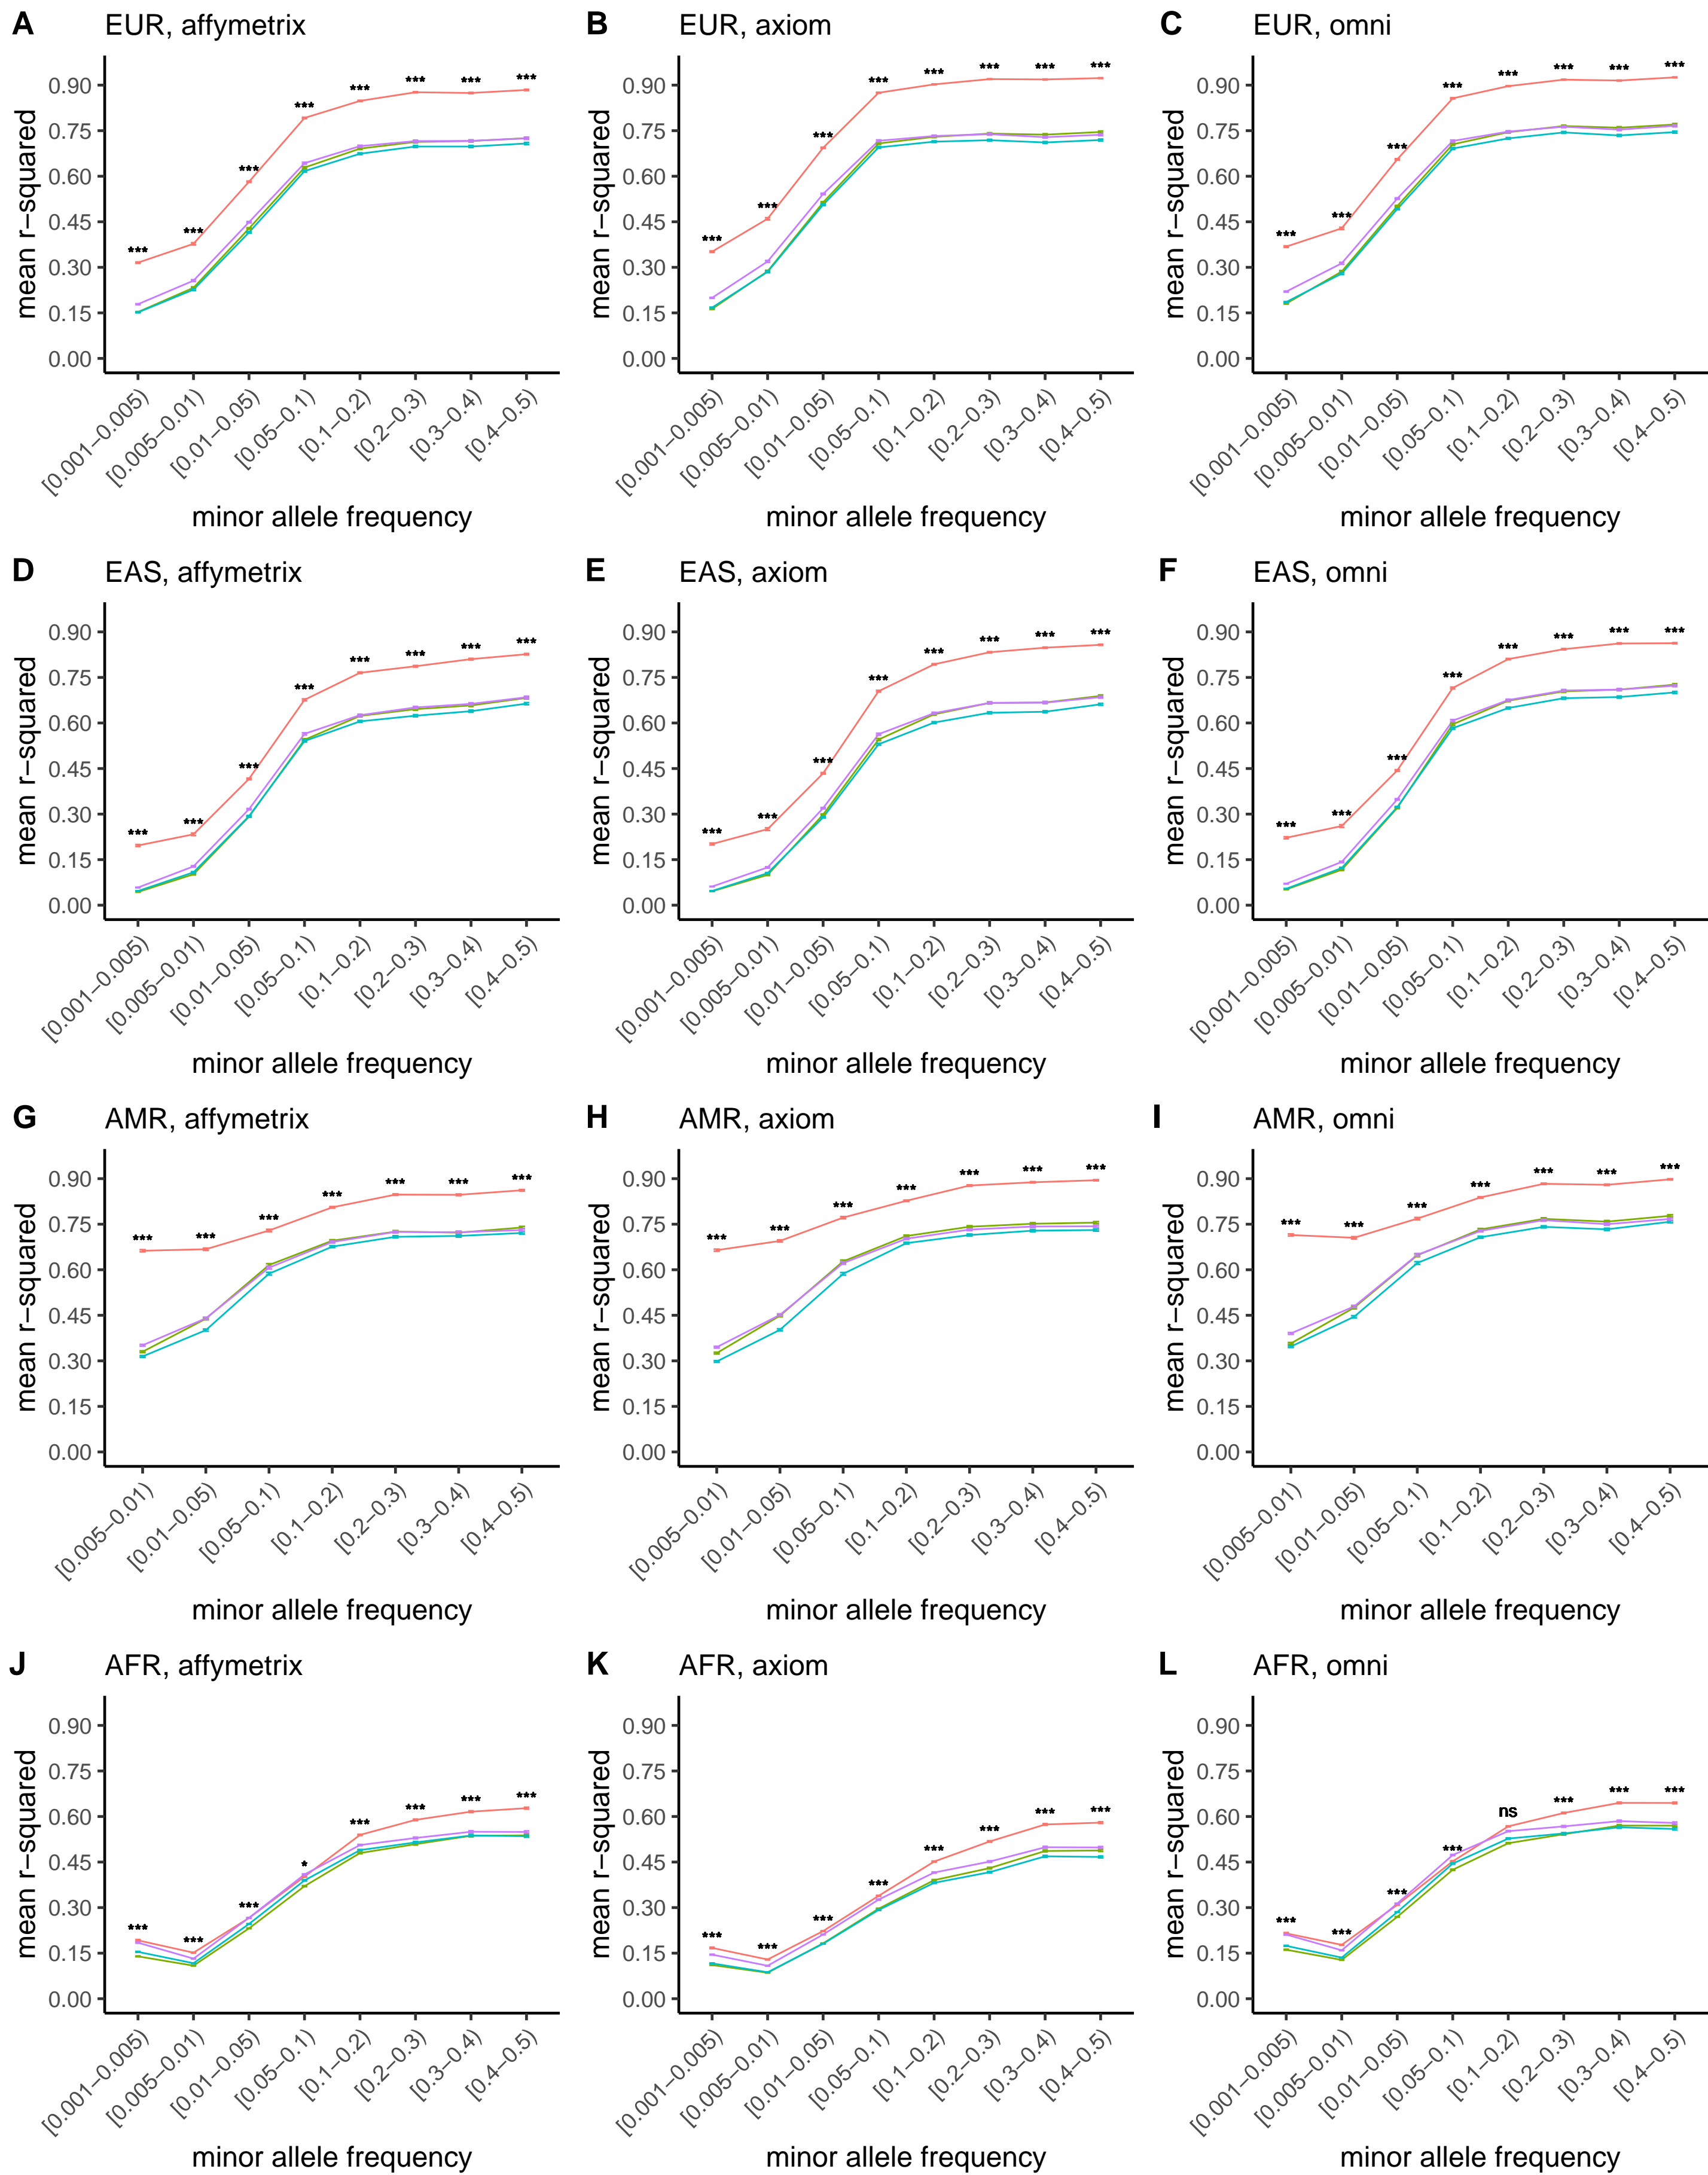

Supplement: supp [file elife-75600-supp-v1.zip]

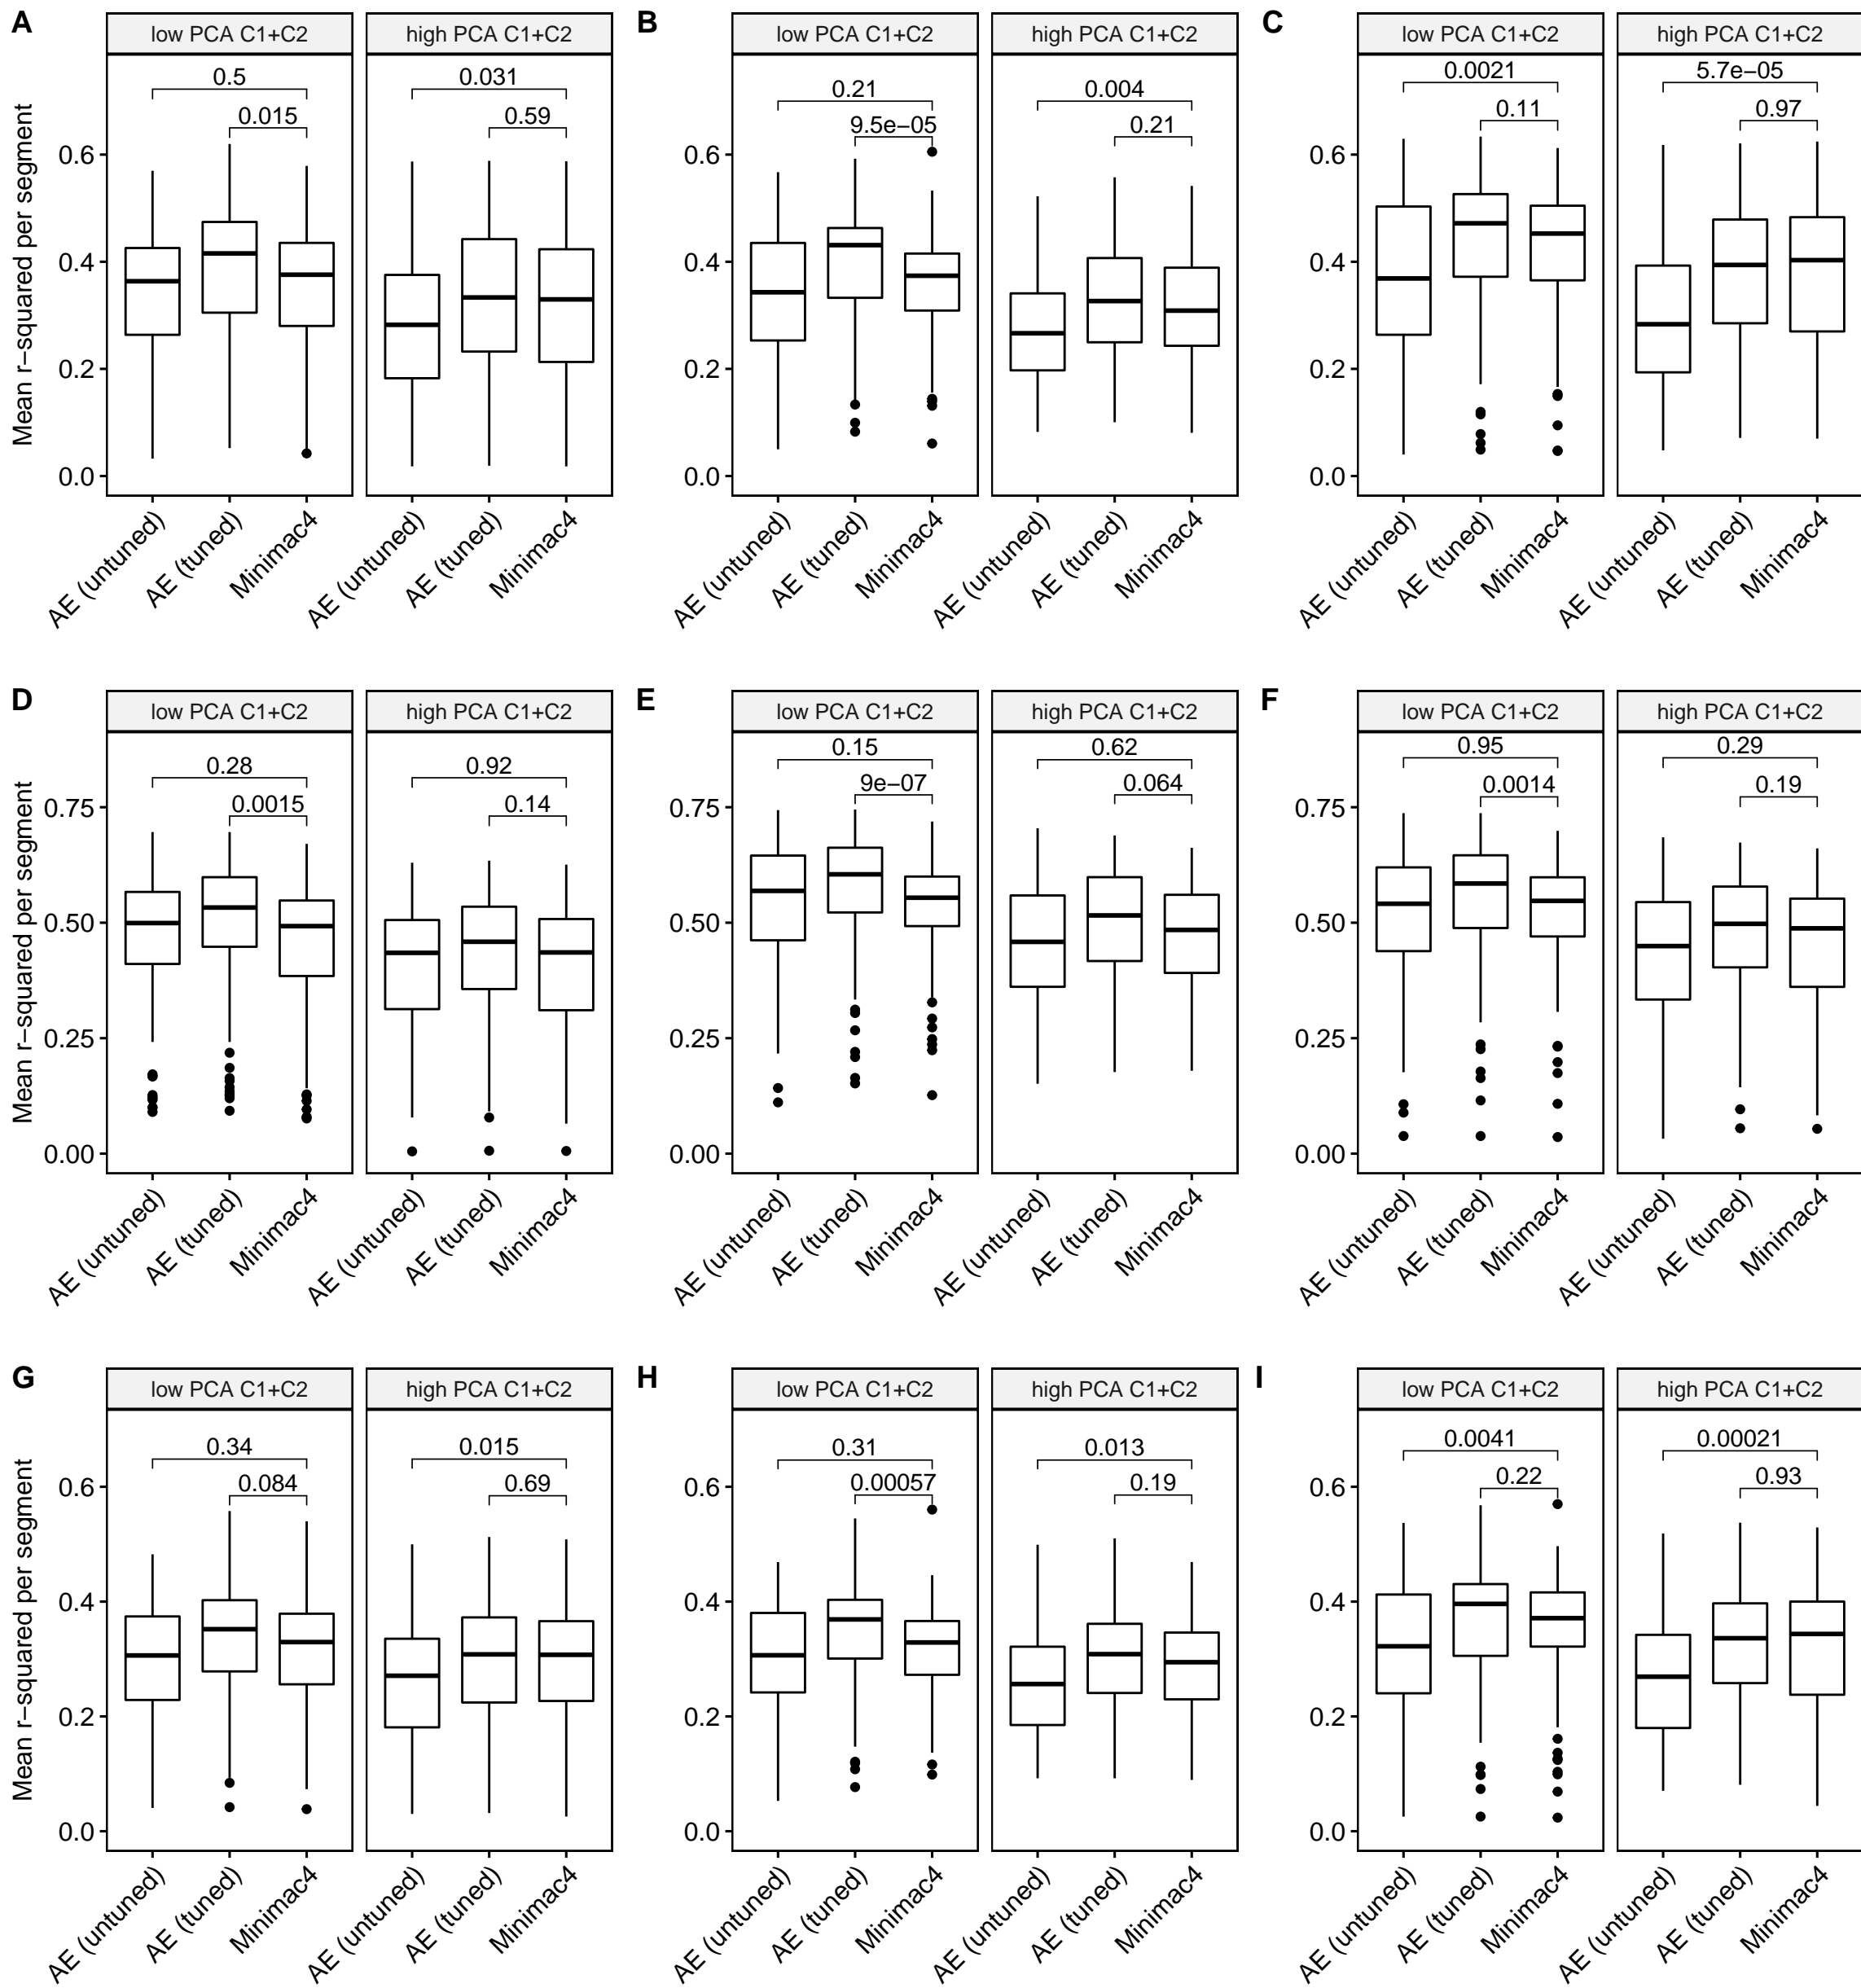

Supplement: supp [file elife-75600-supp-v1.zip]

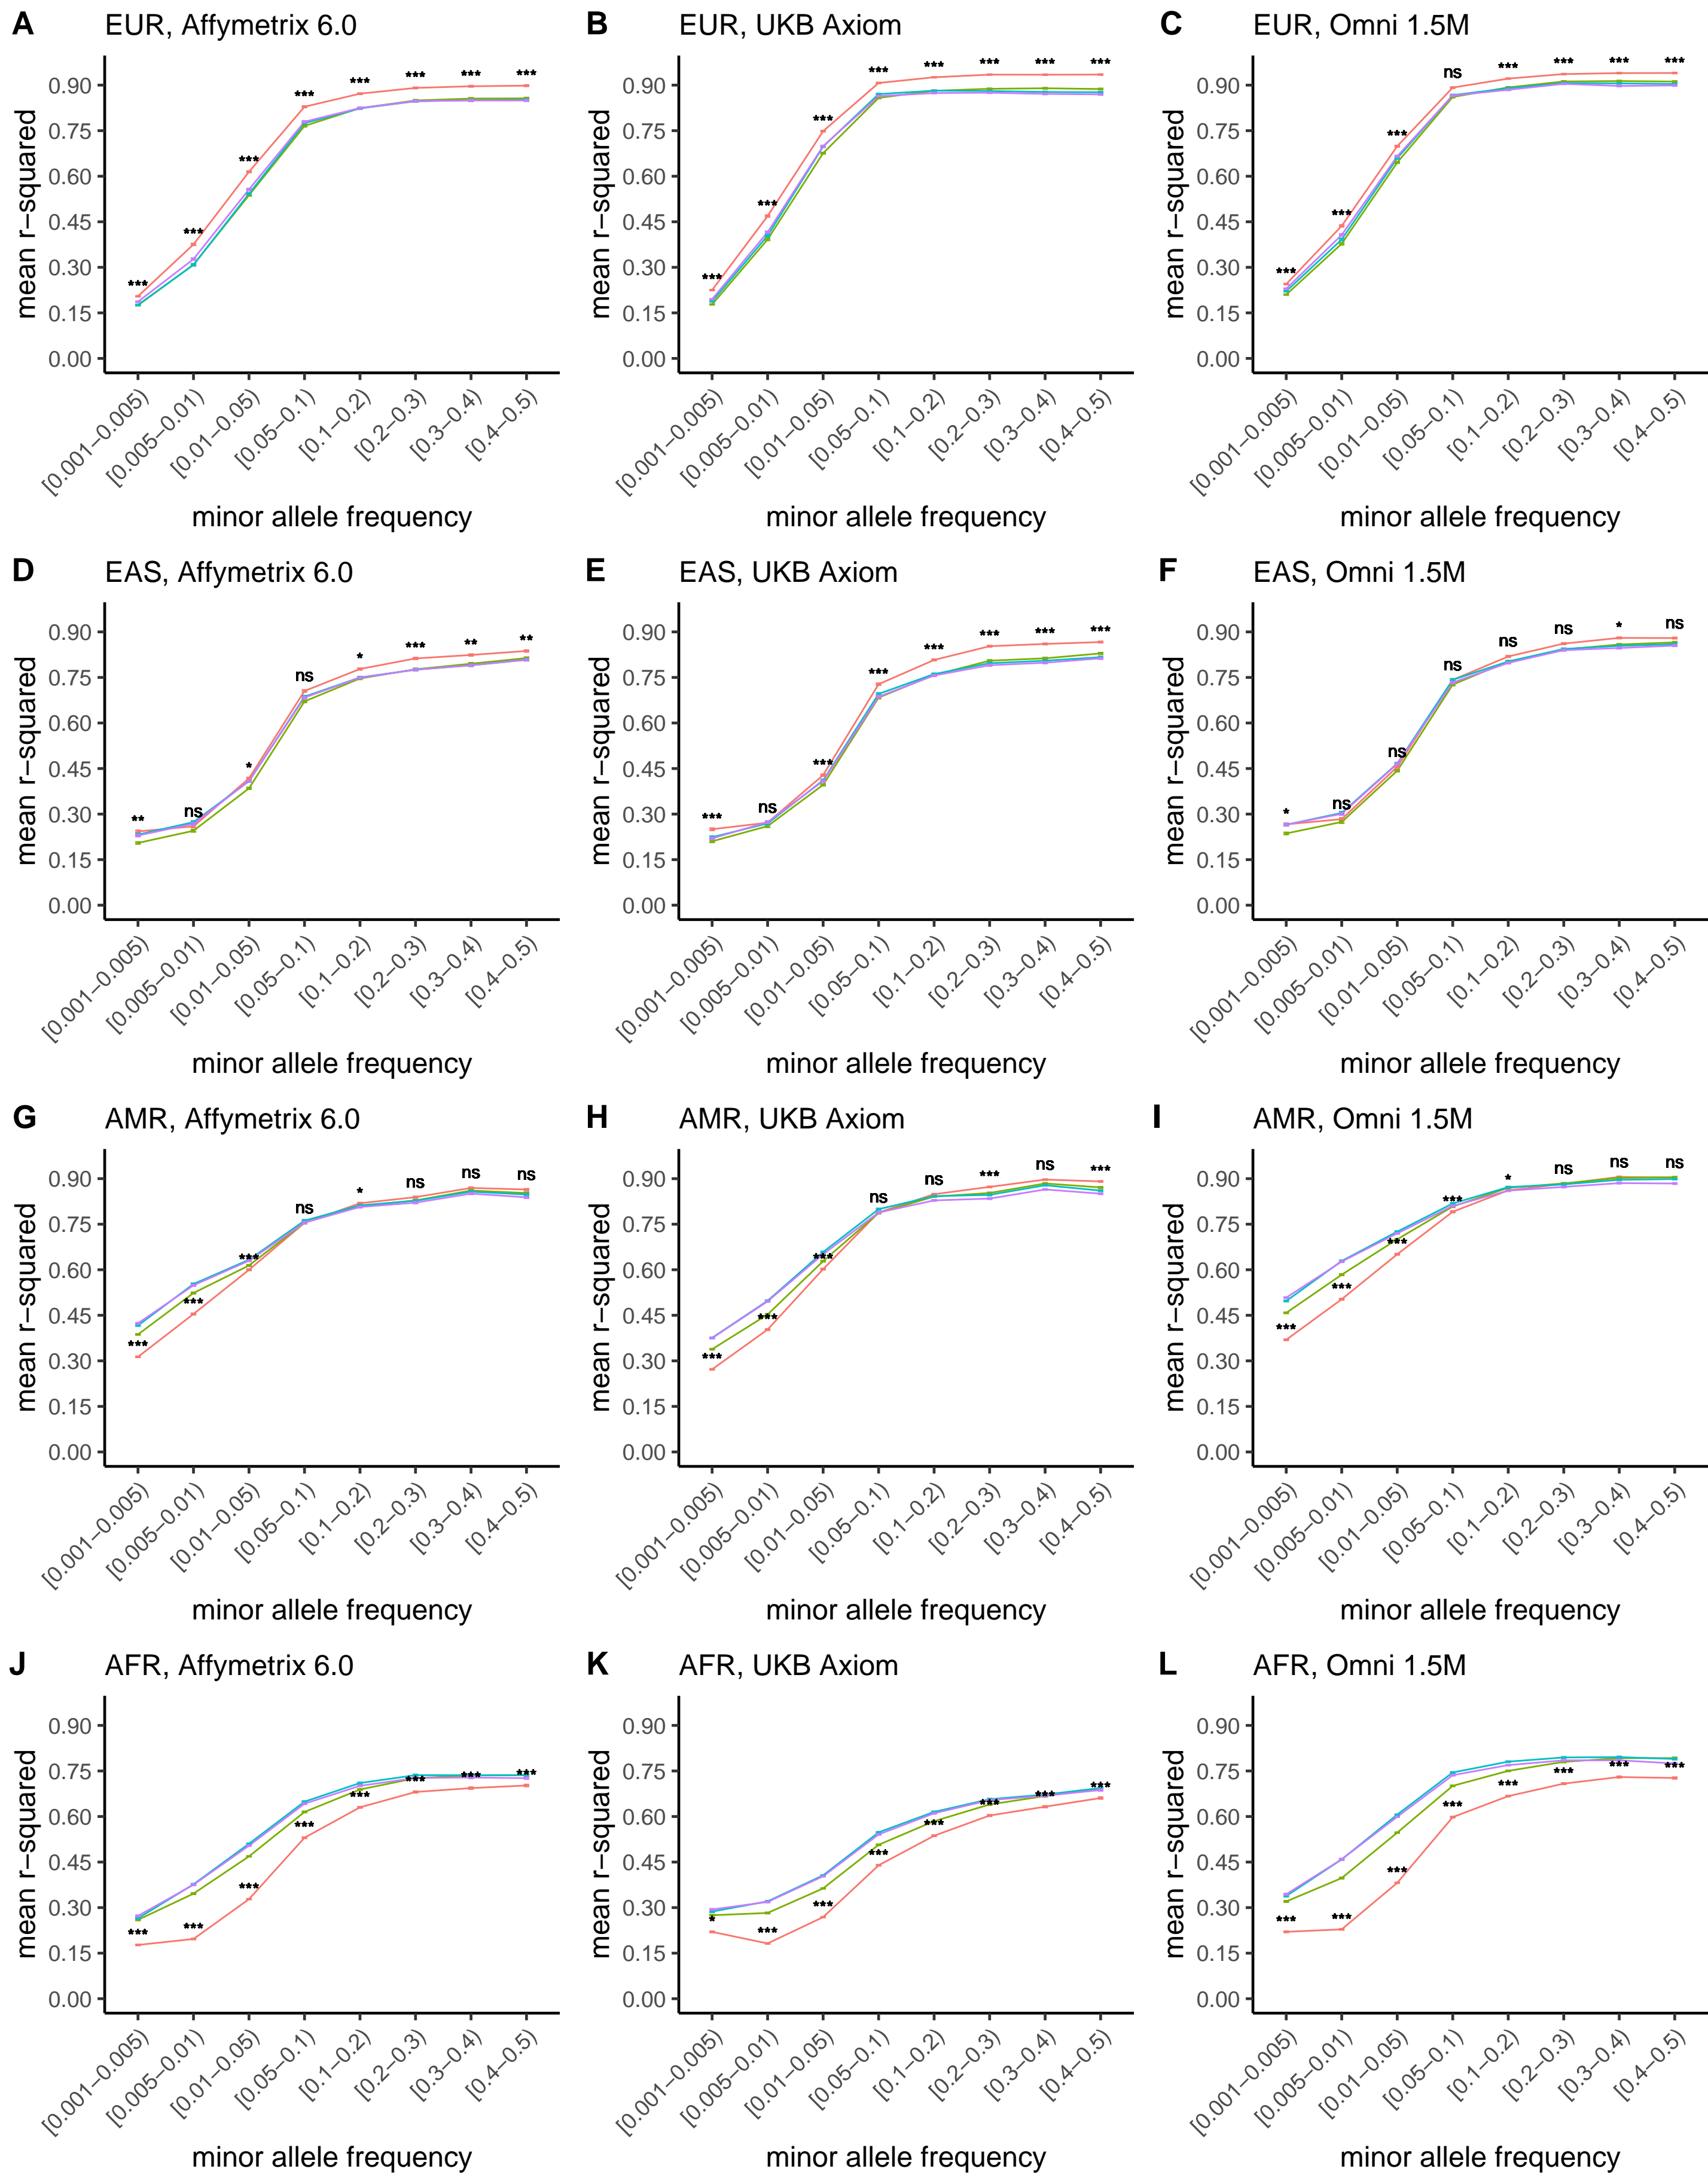

Supplement: supp [file elife-75600-supp-v1.zip]

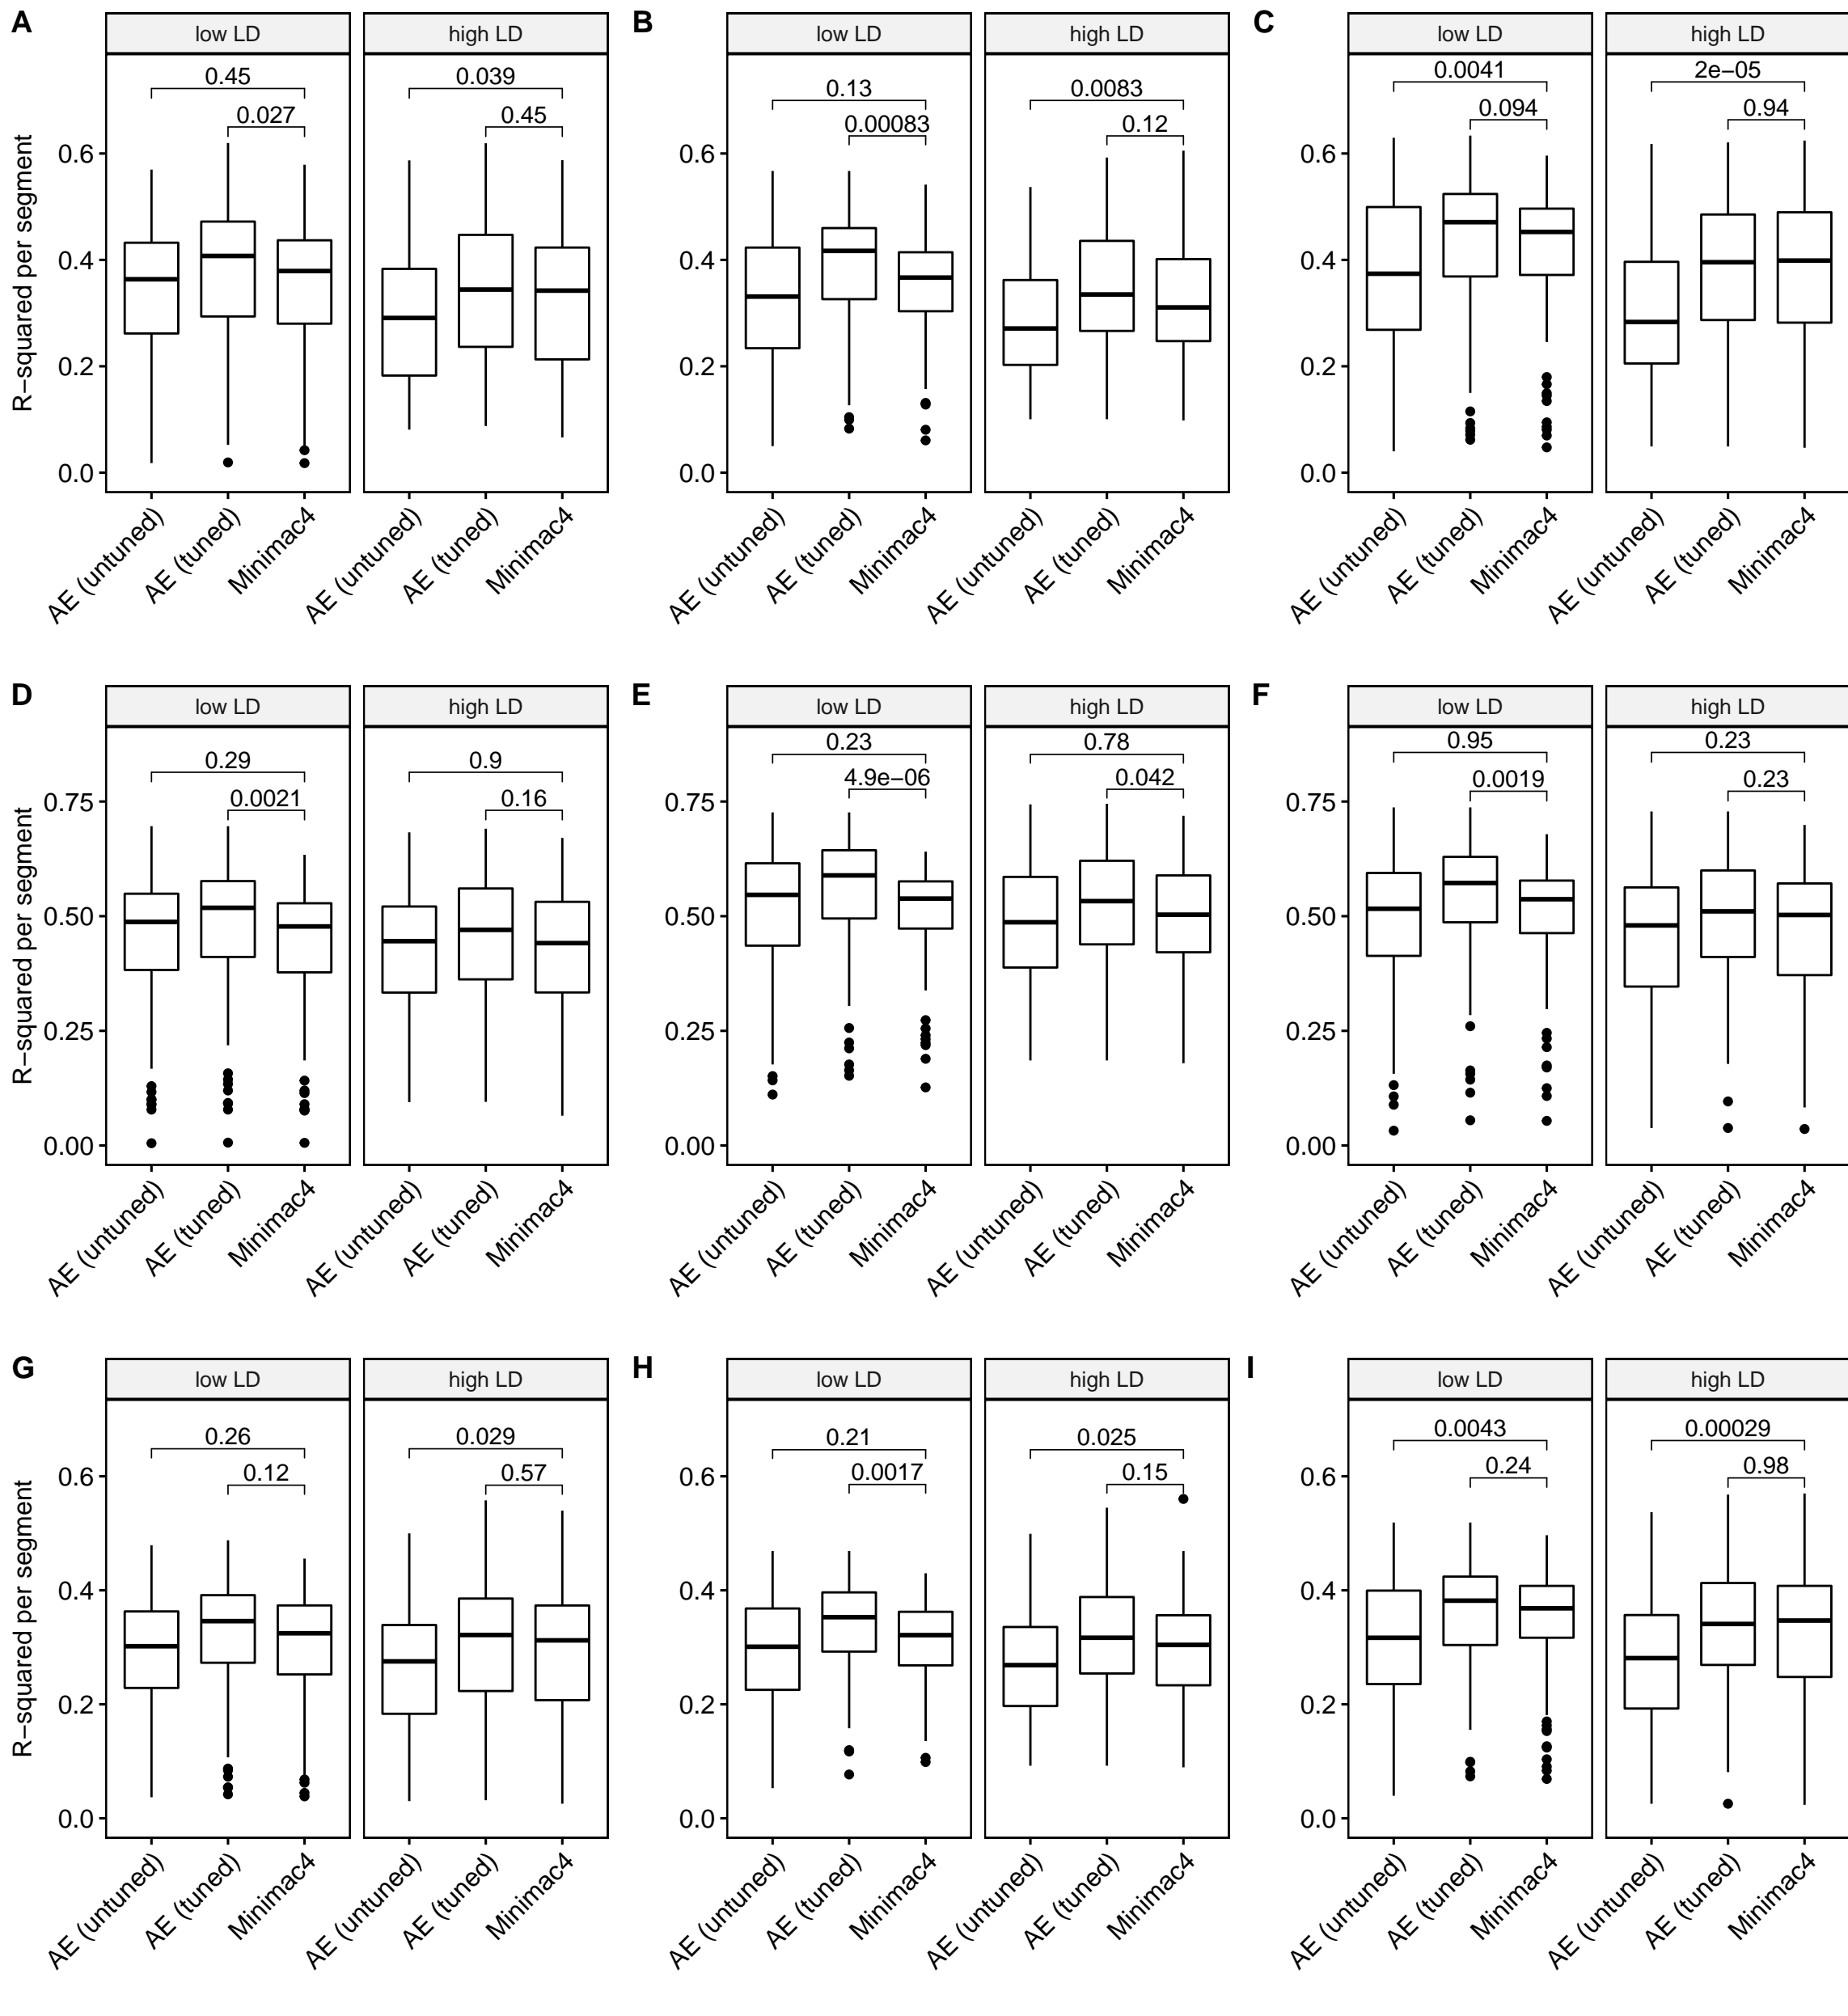

Supplement: supp [file elife-75600-supp-v1.zip]

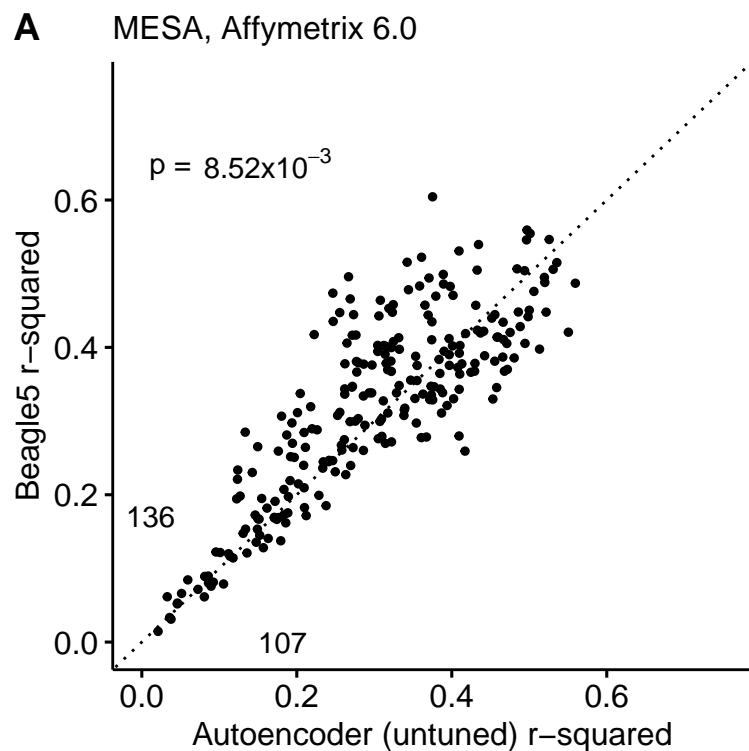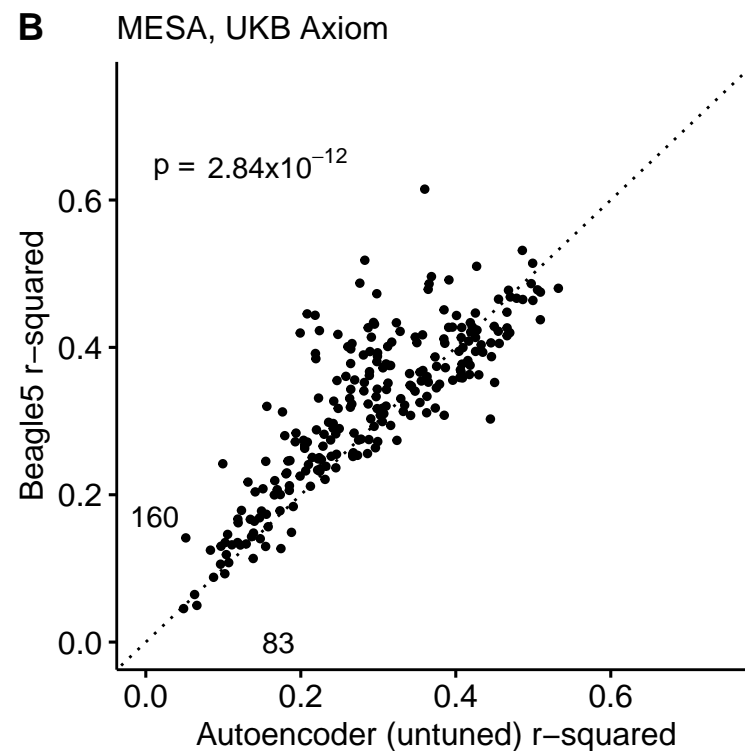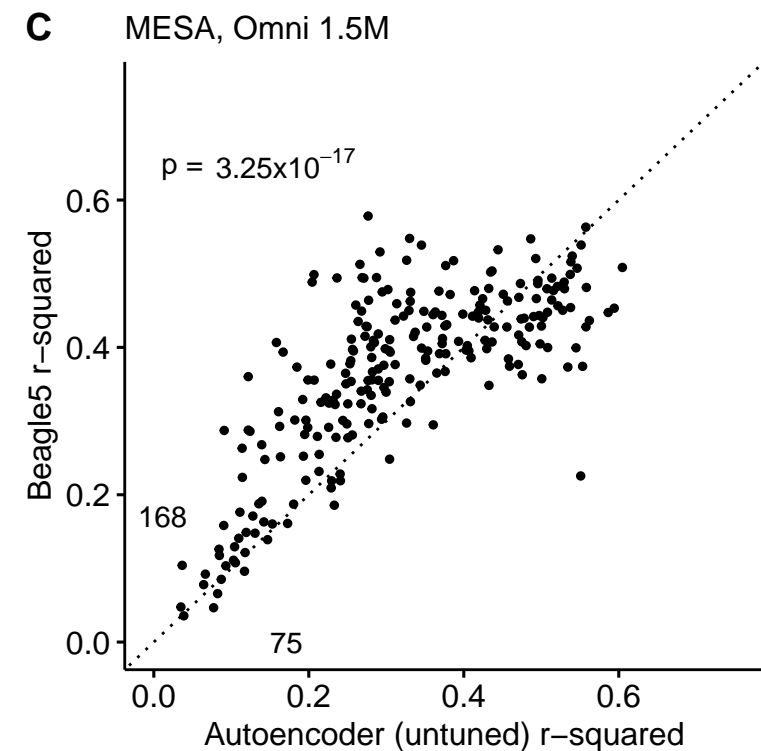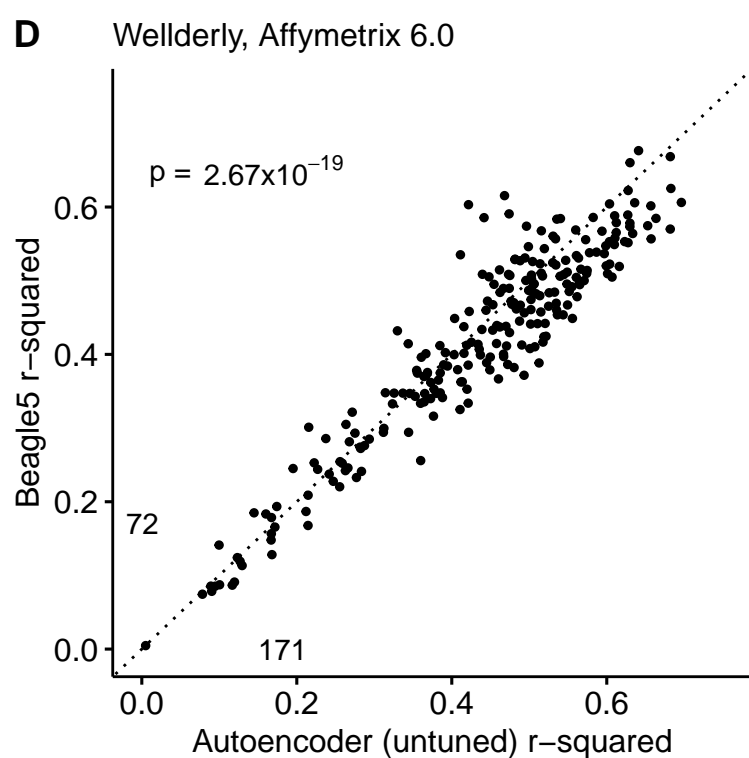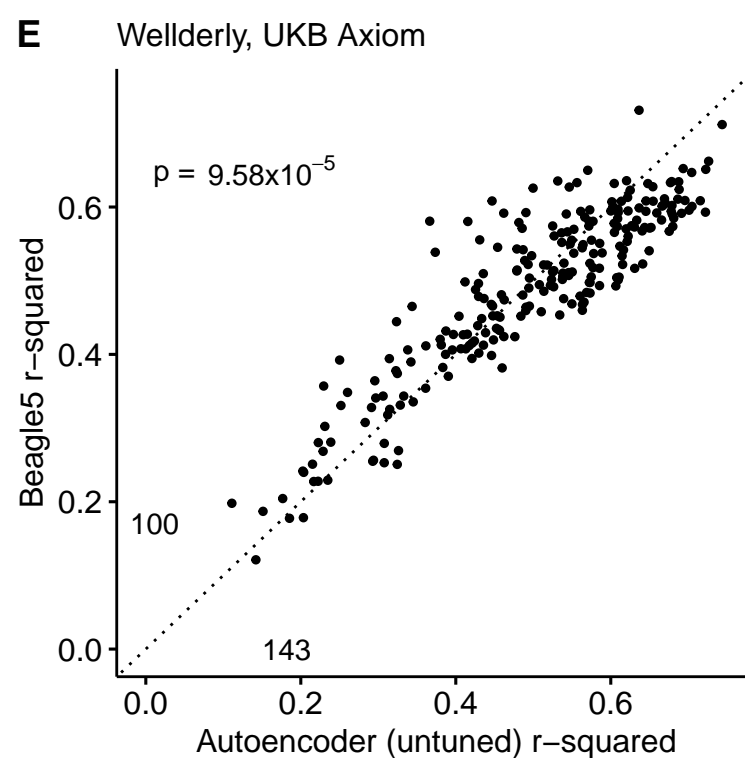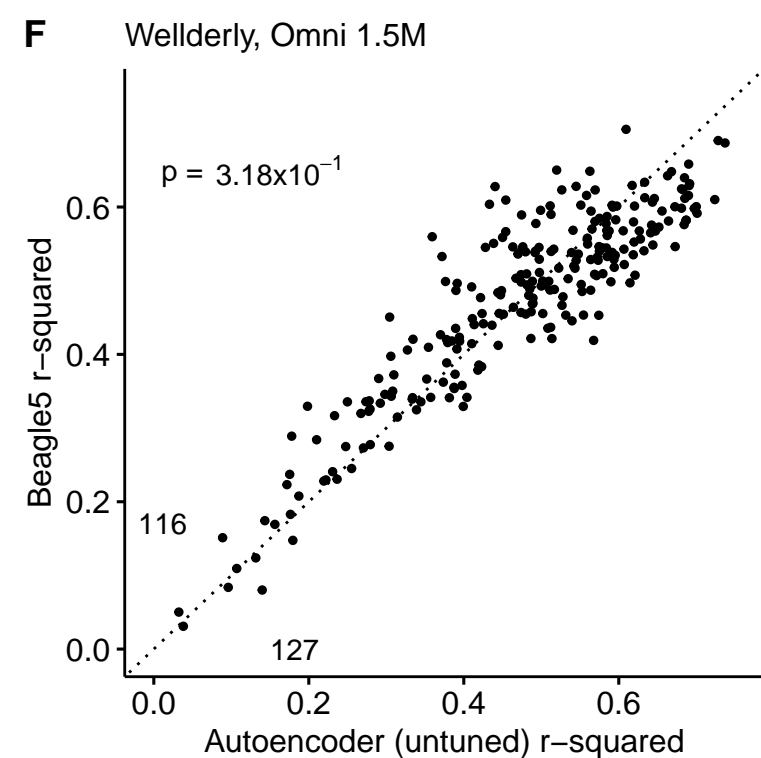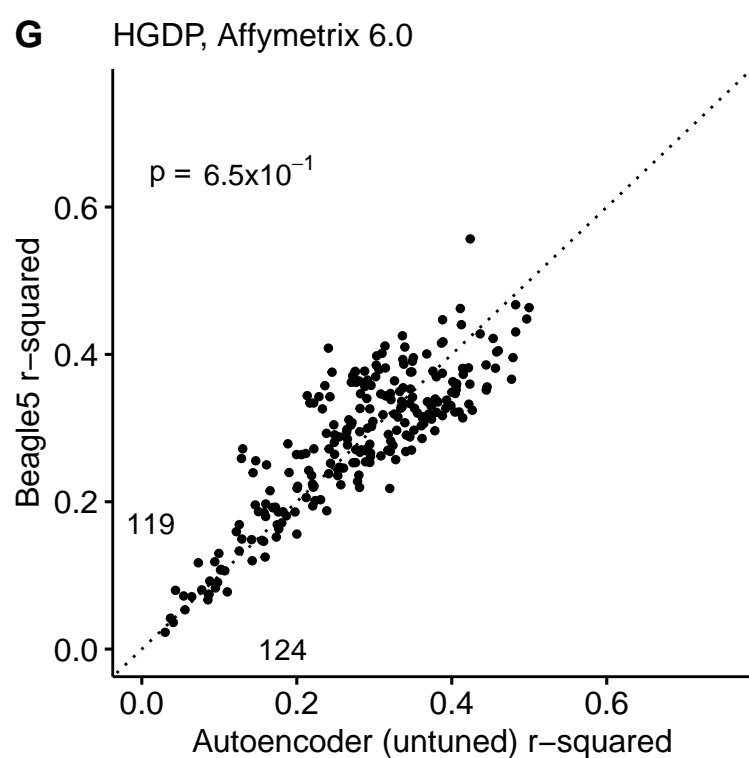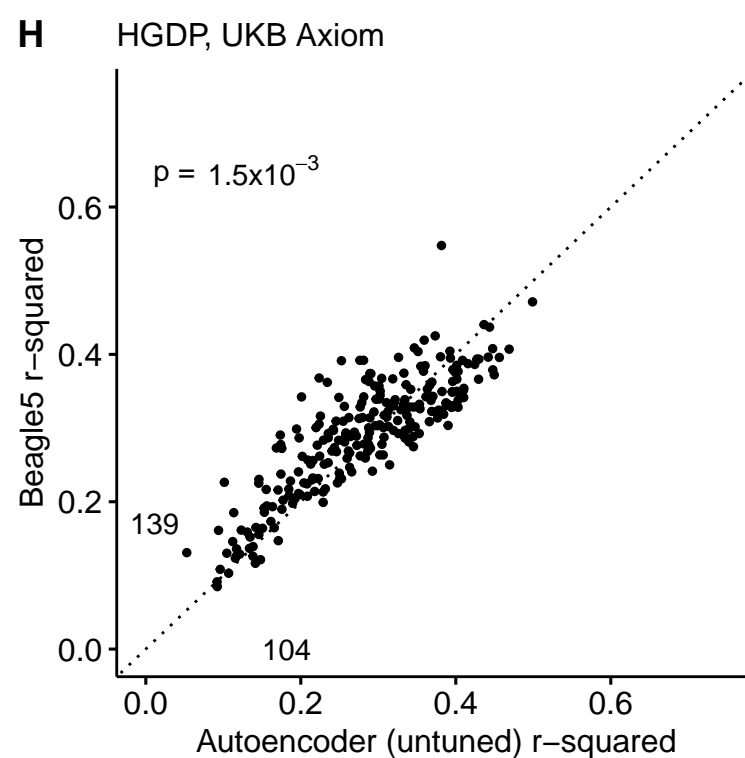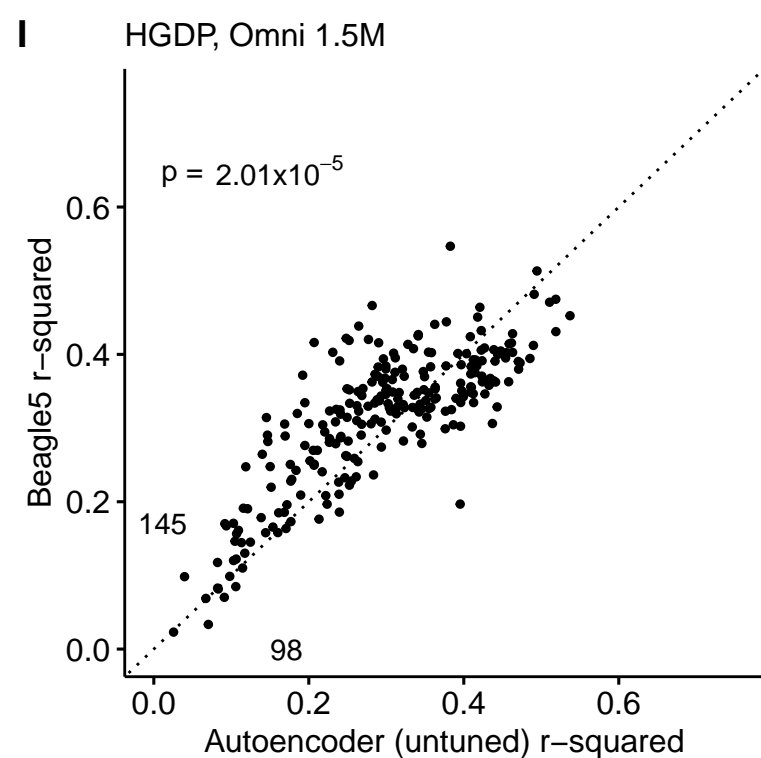

Supplement: supp [file elife-75600-supp-v1.zip]

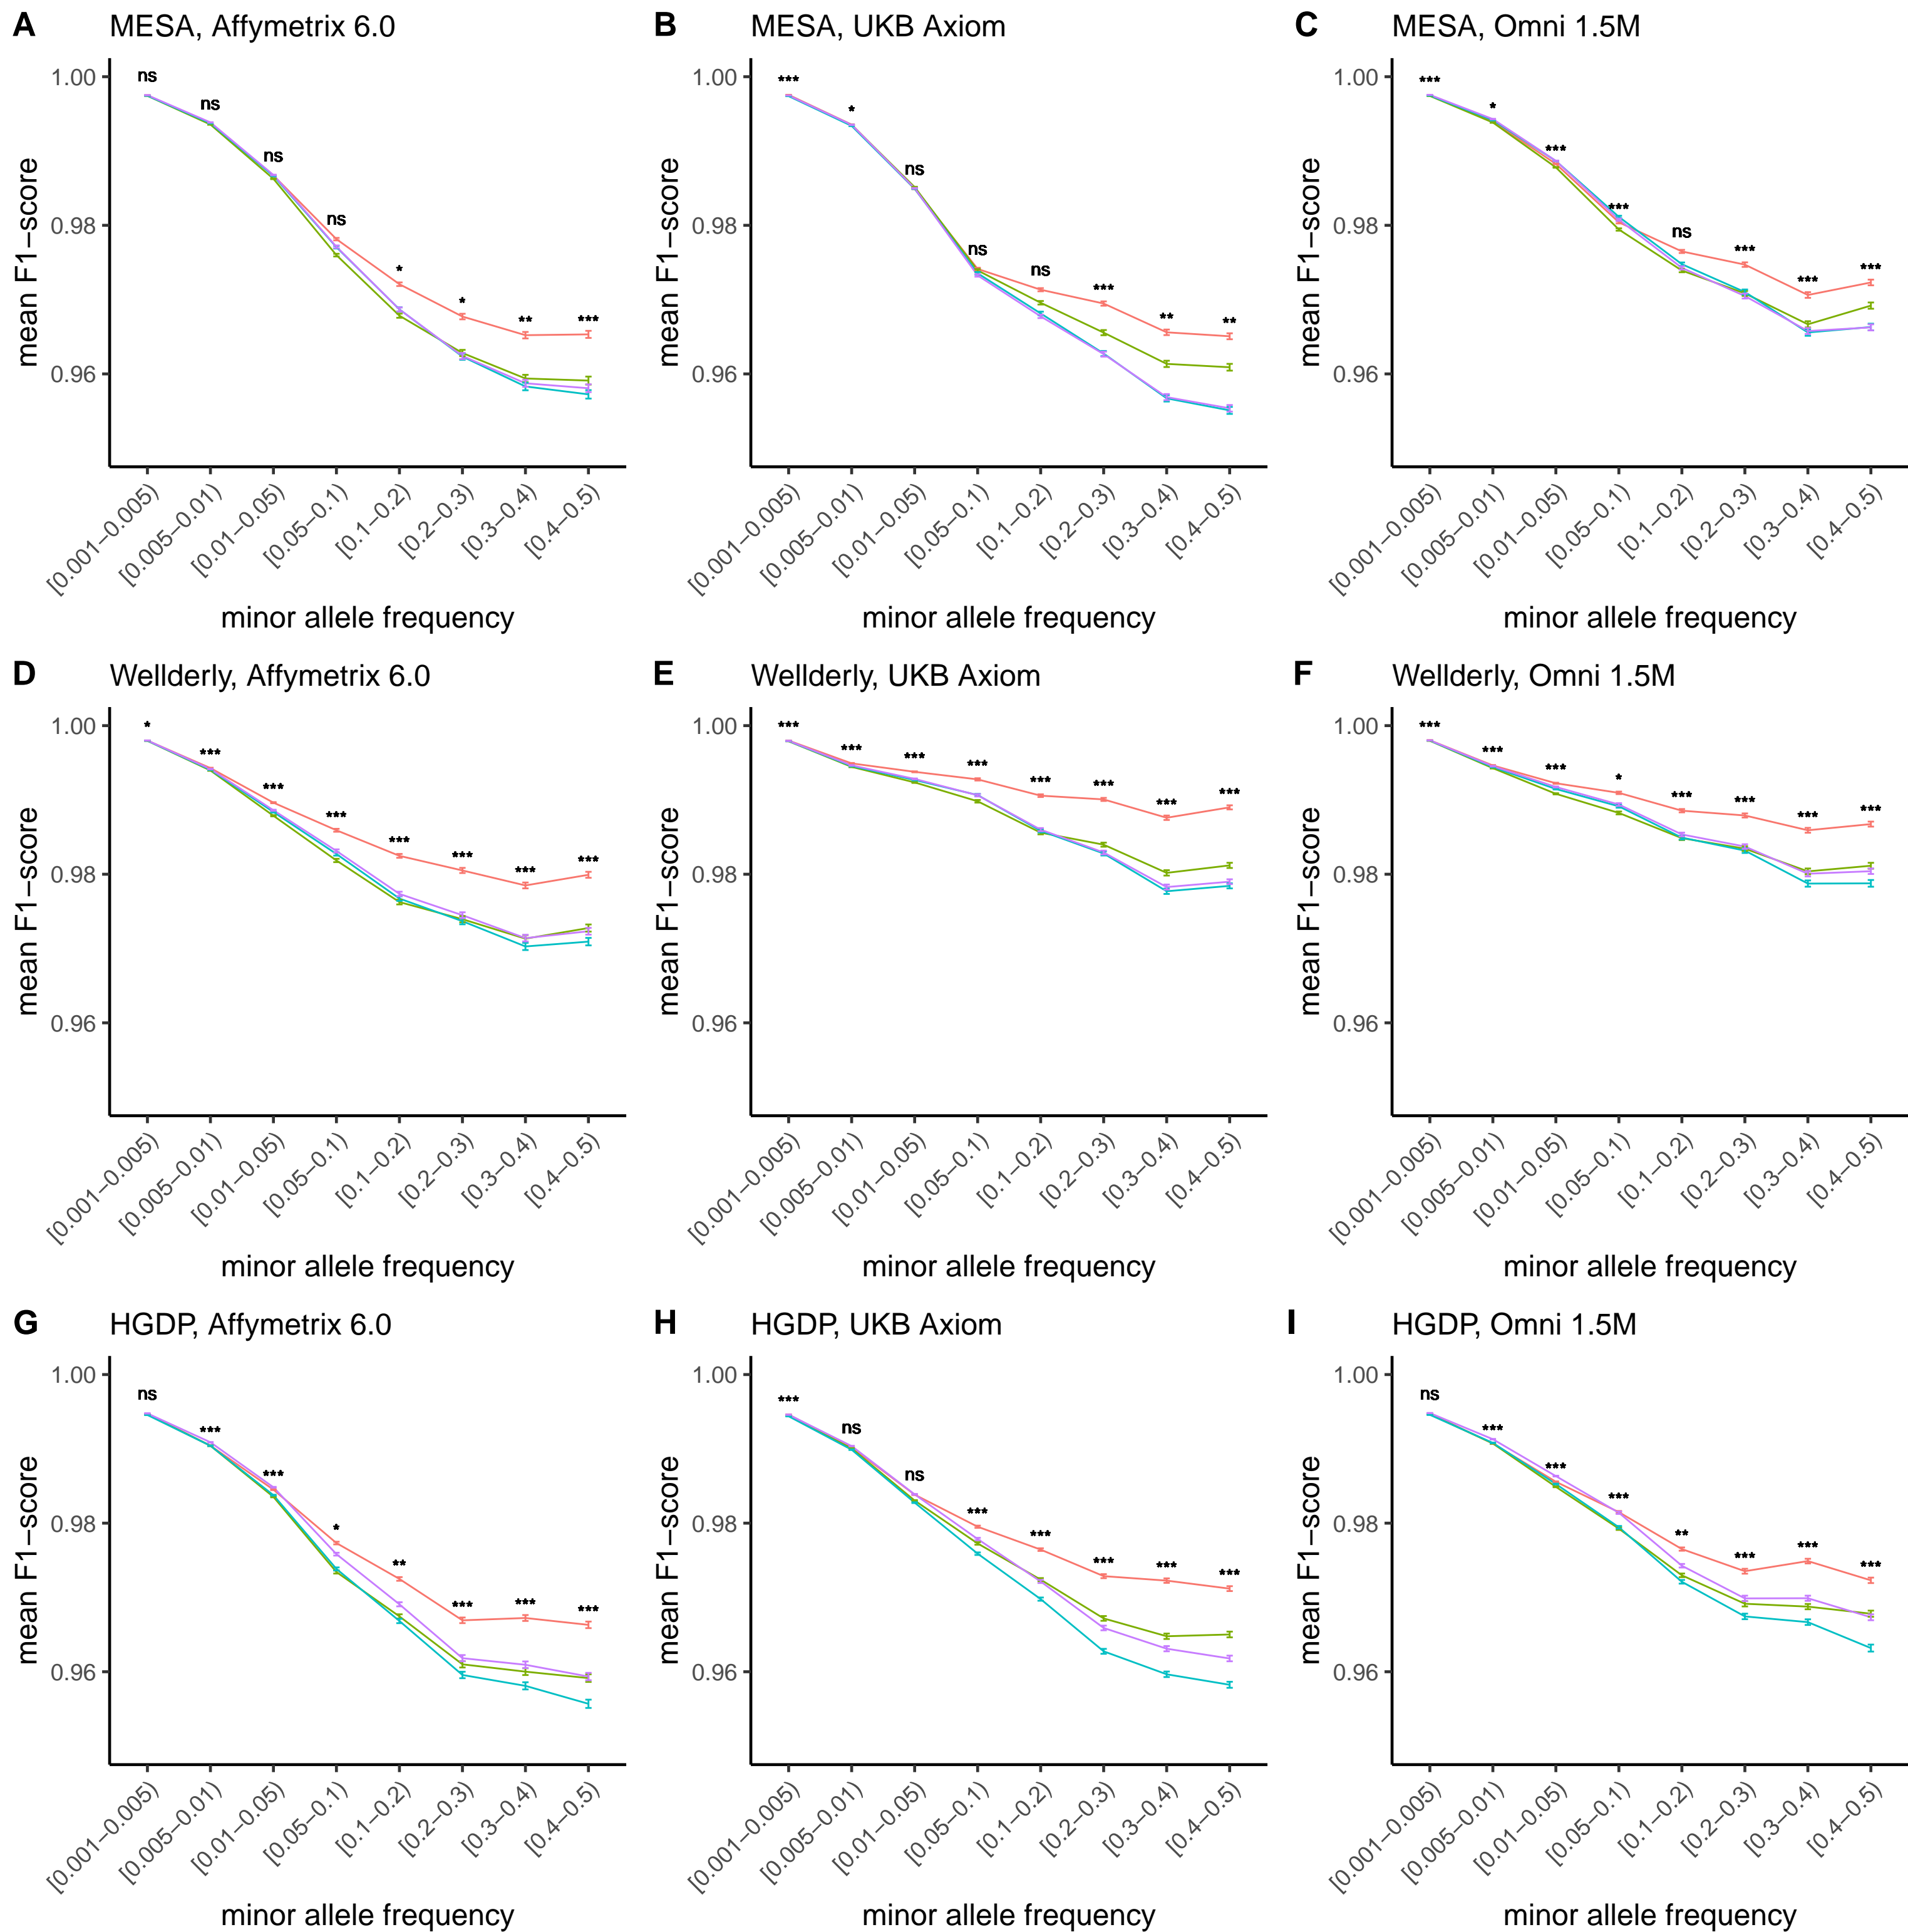

Autoencoder Beagle5 Minimac4 Impute5

Supplement: supp [file elife-75600-supp-v1.zip]

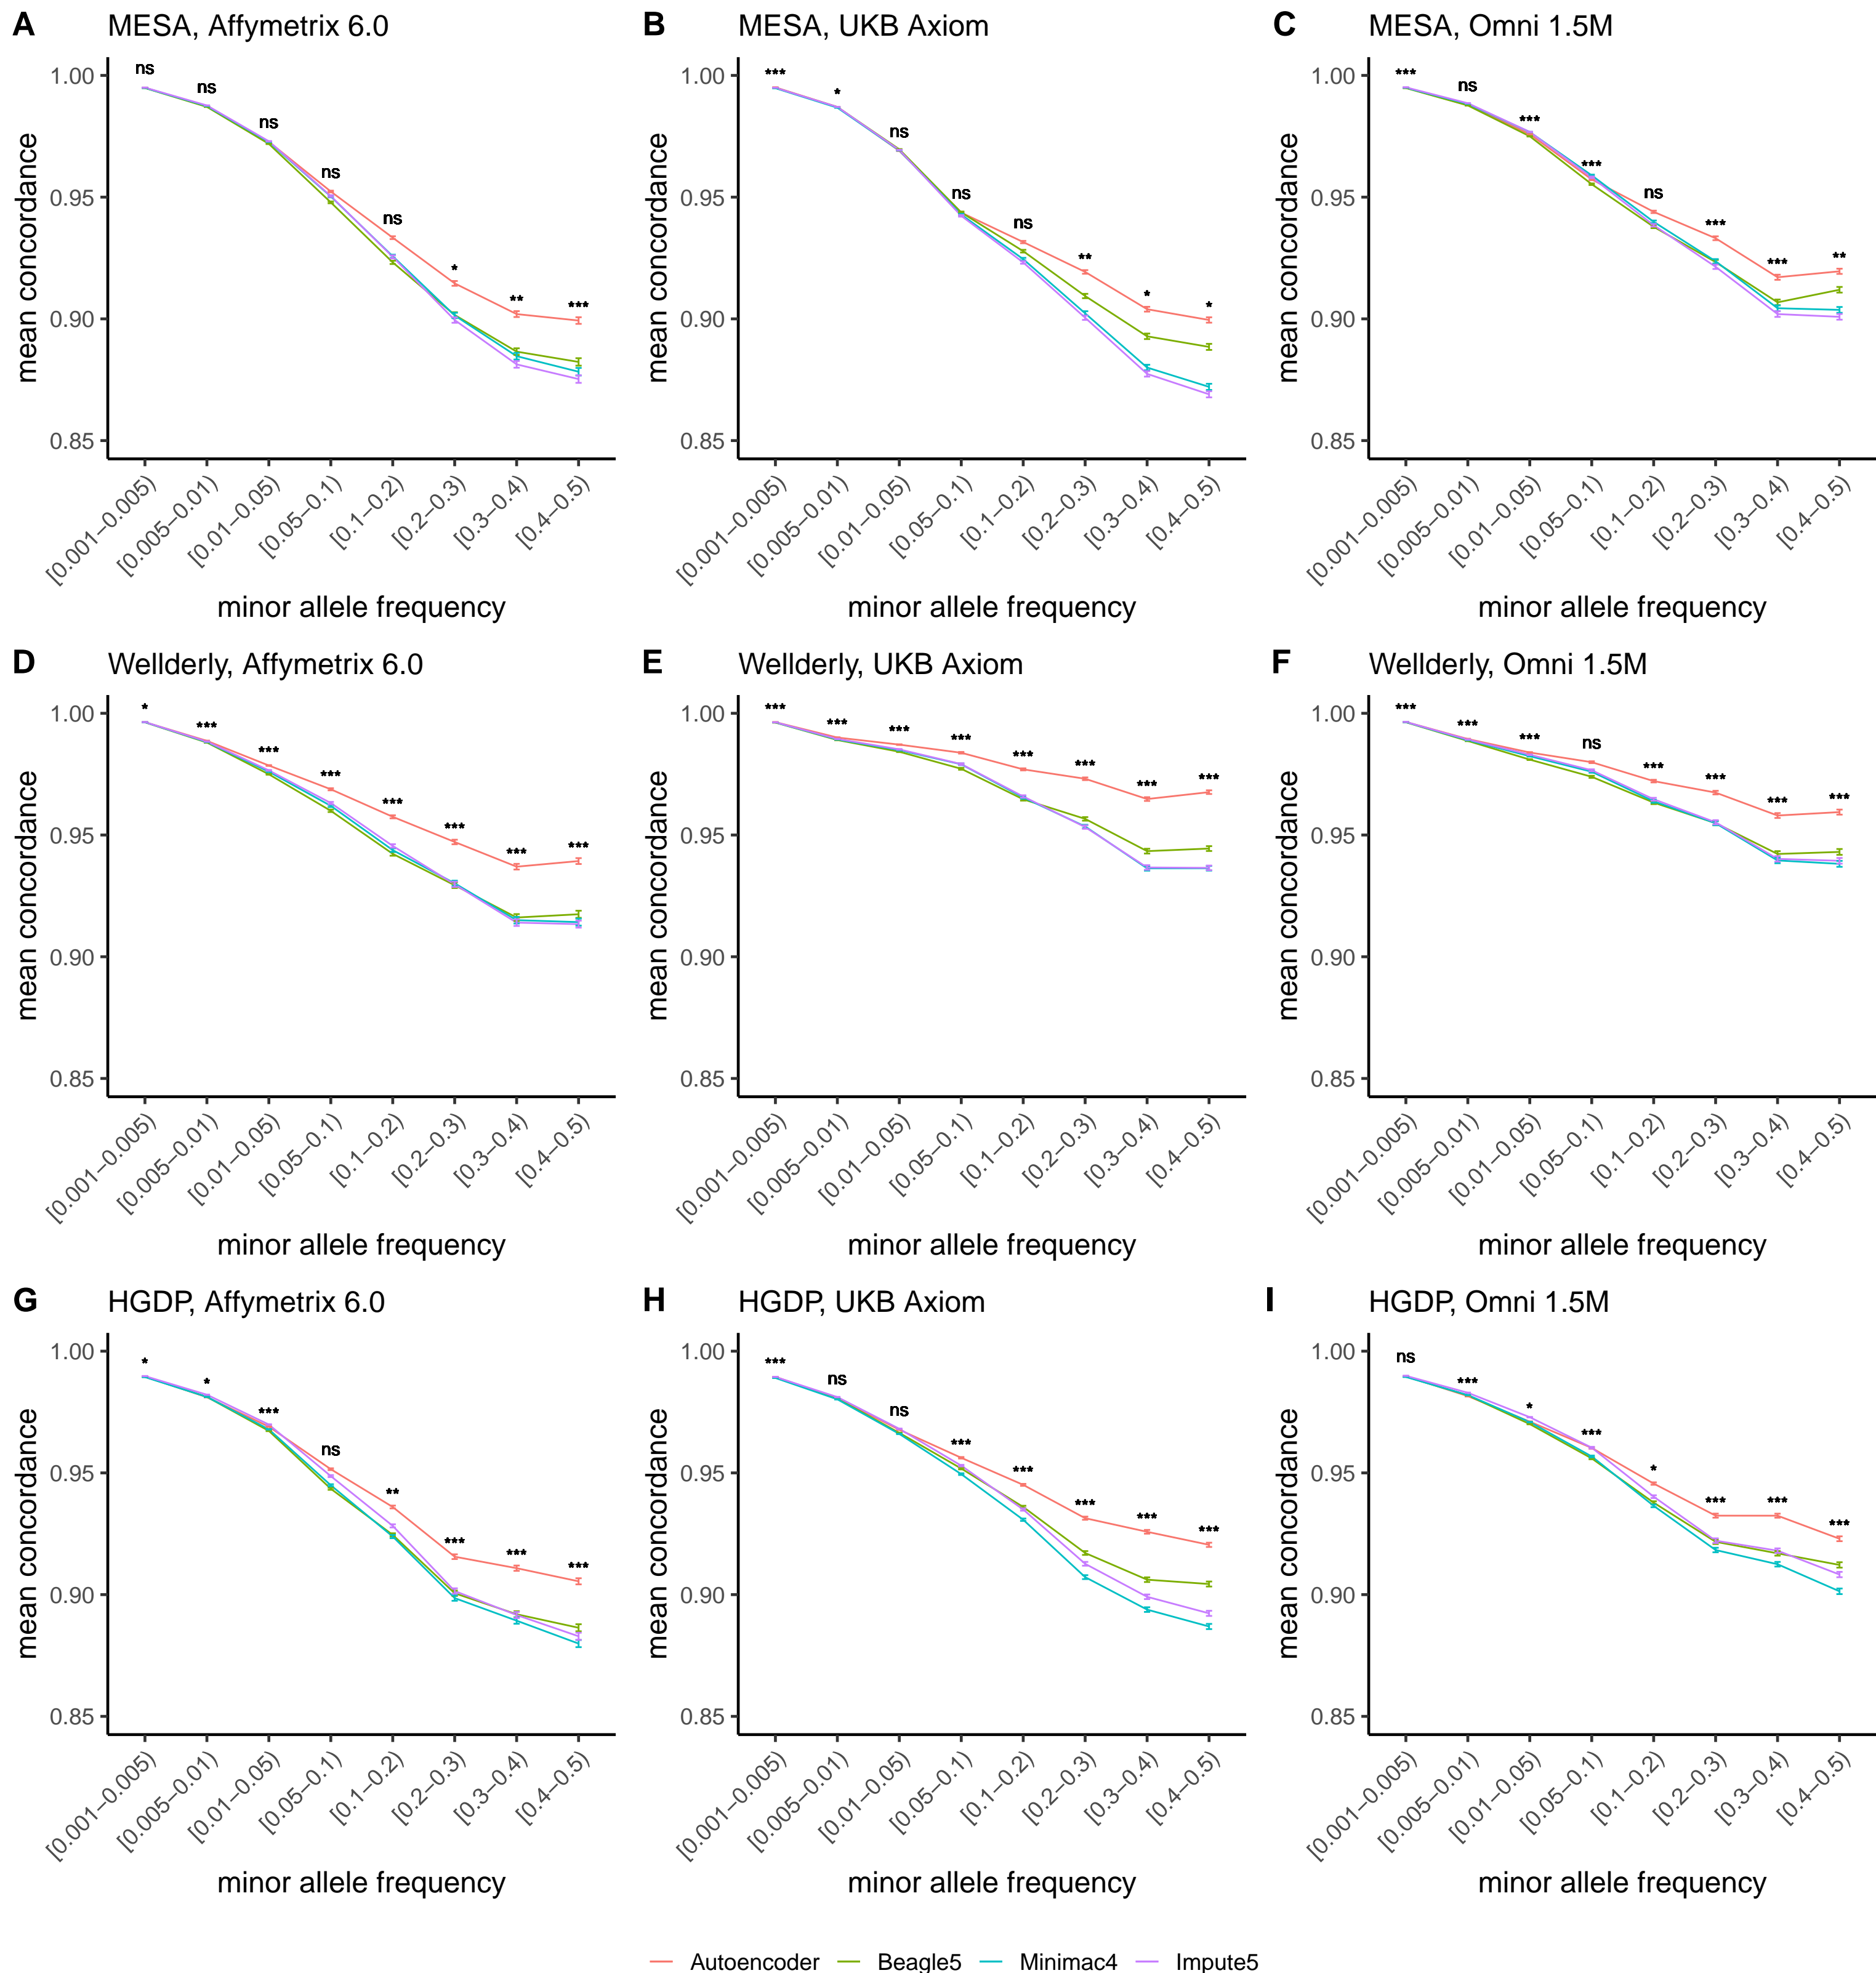

Supplement: supp [file elife-75600-supp-v1.zip]

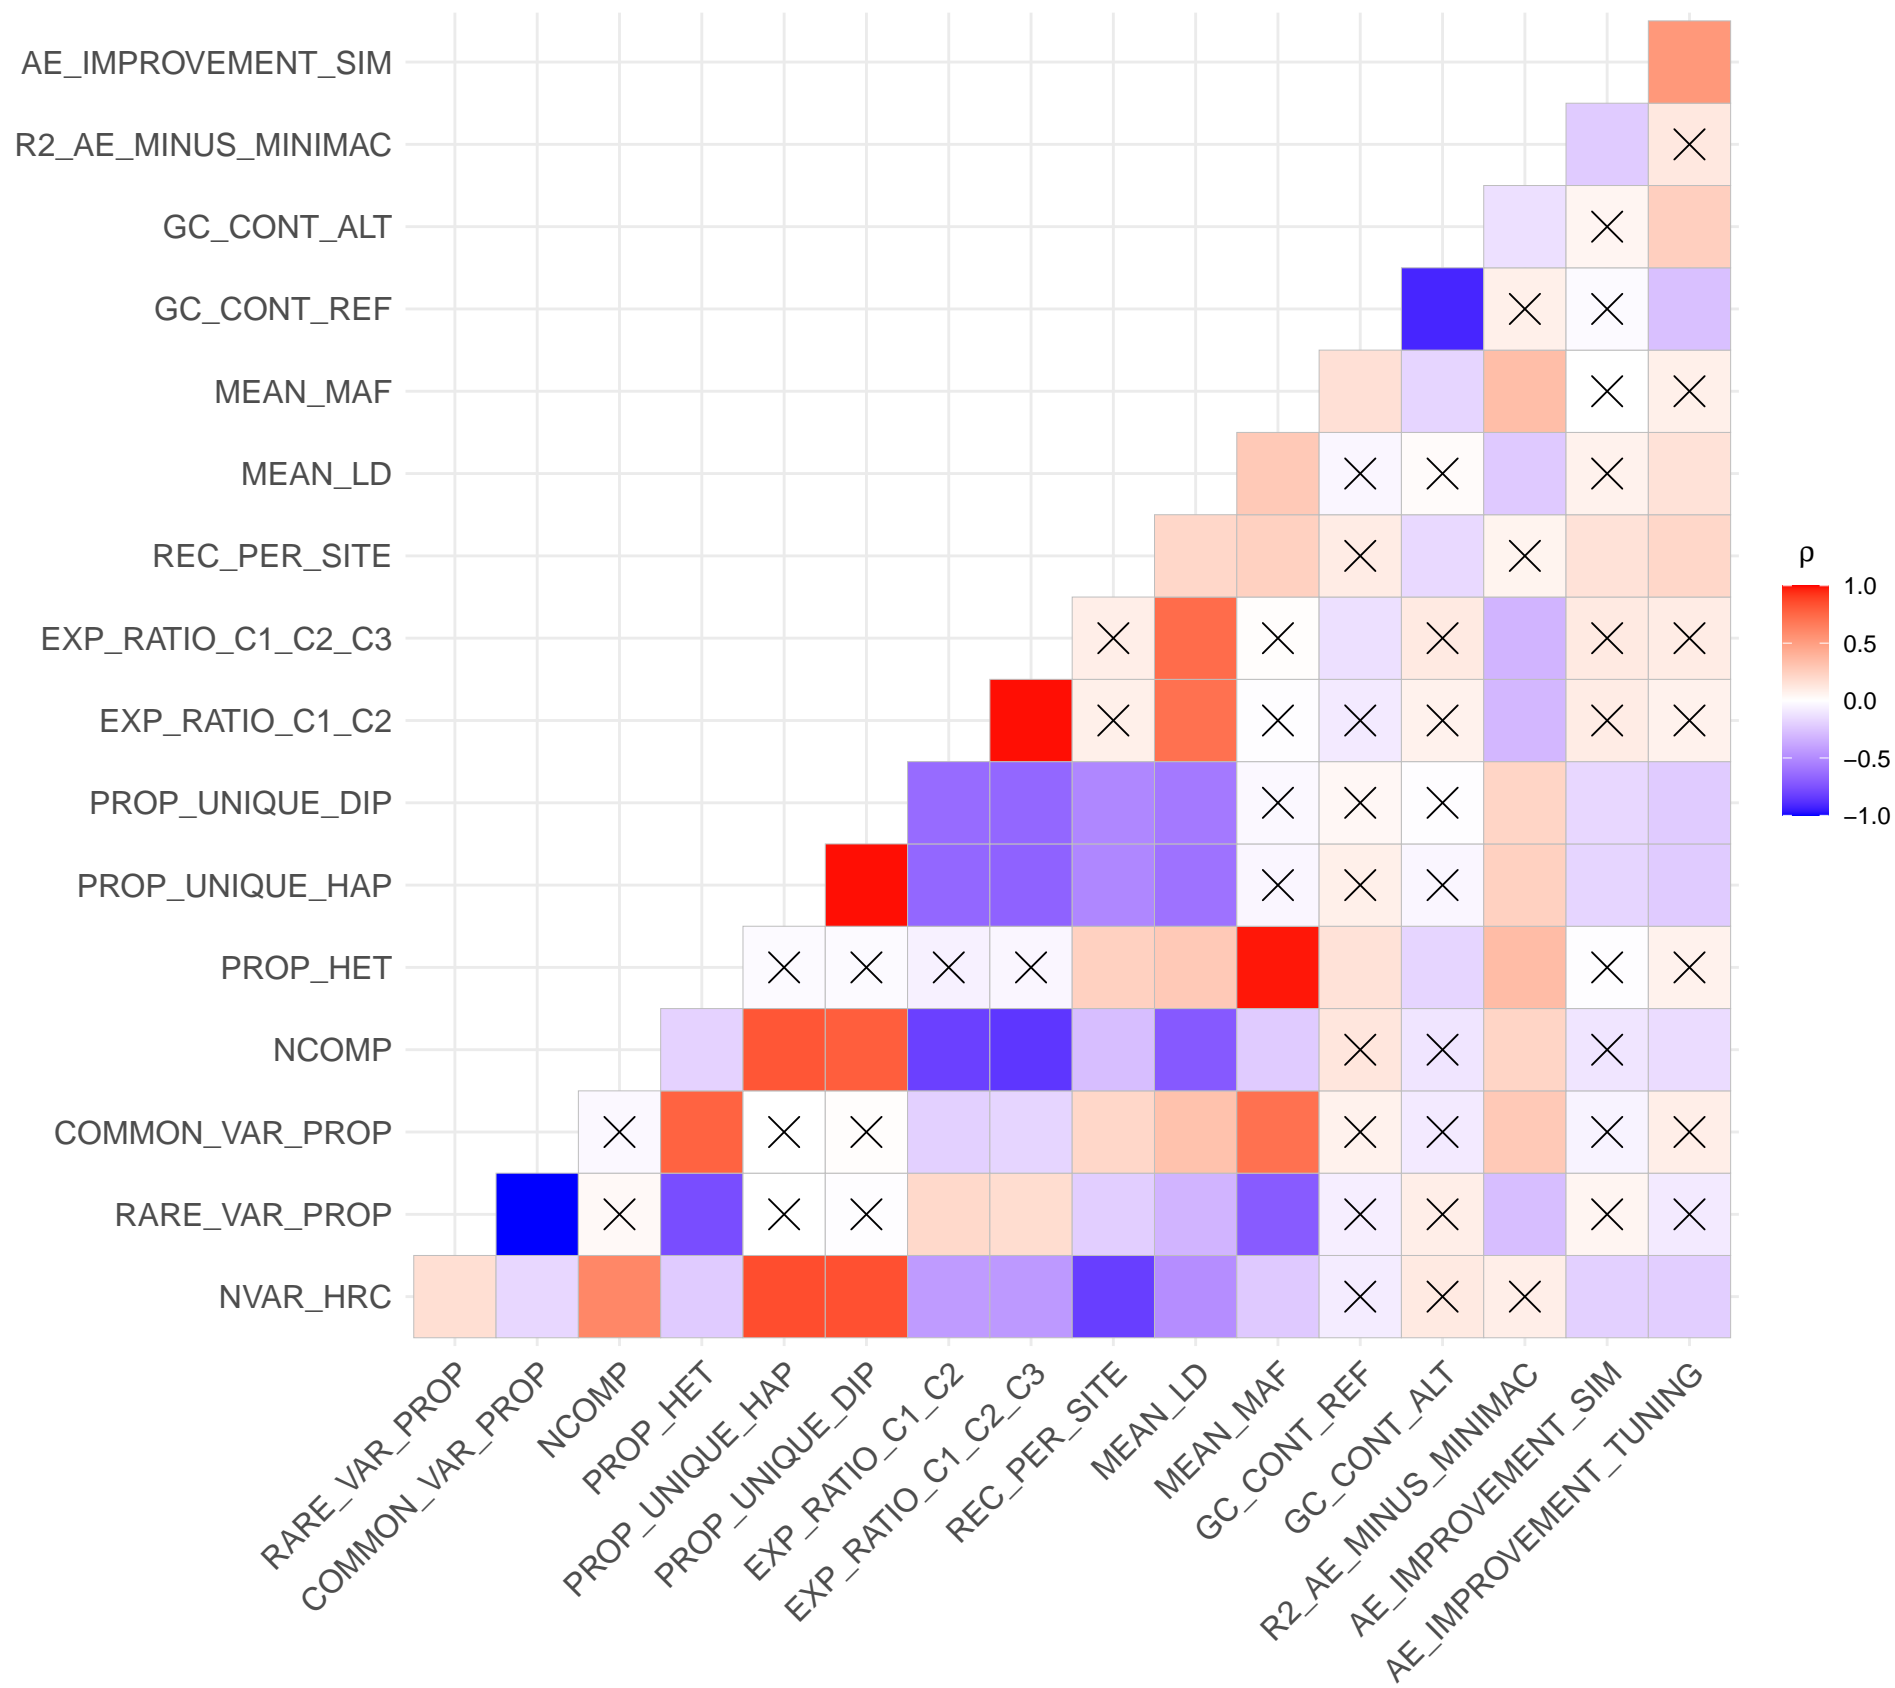

Supplement: supp [file elife-75600-supp-v1.zip]

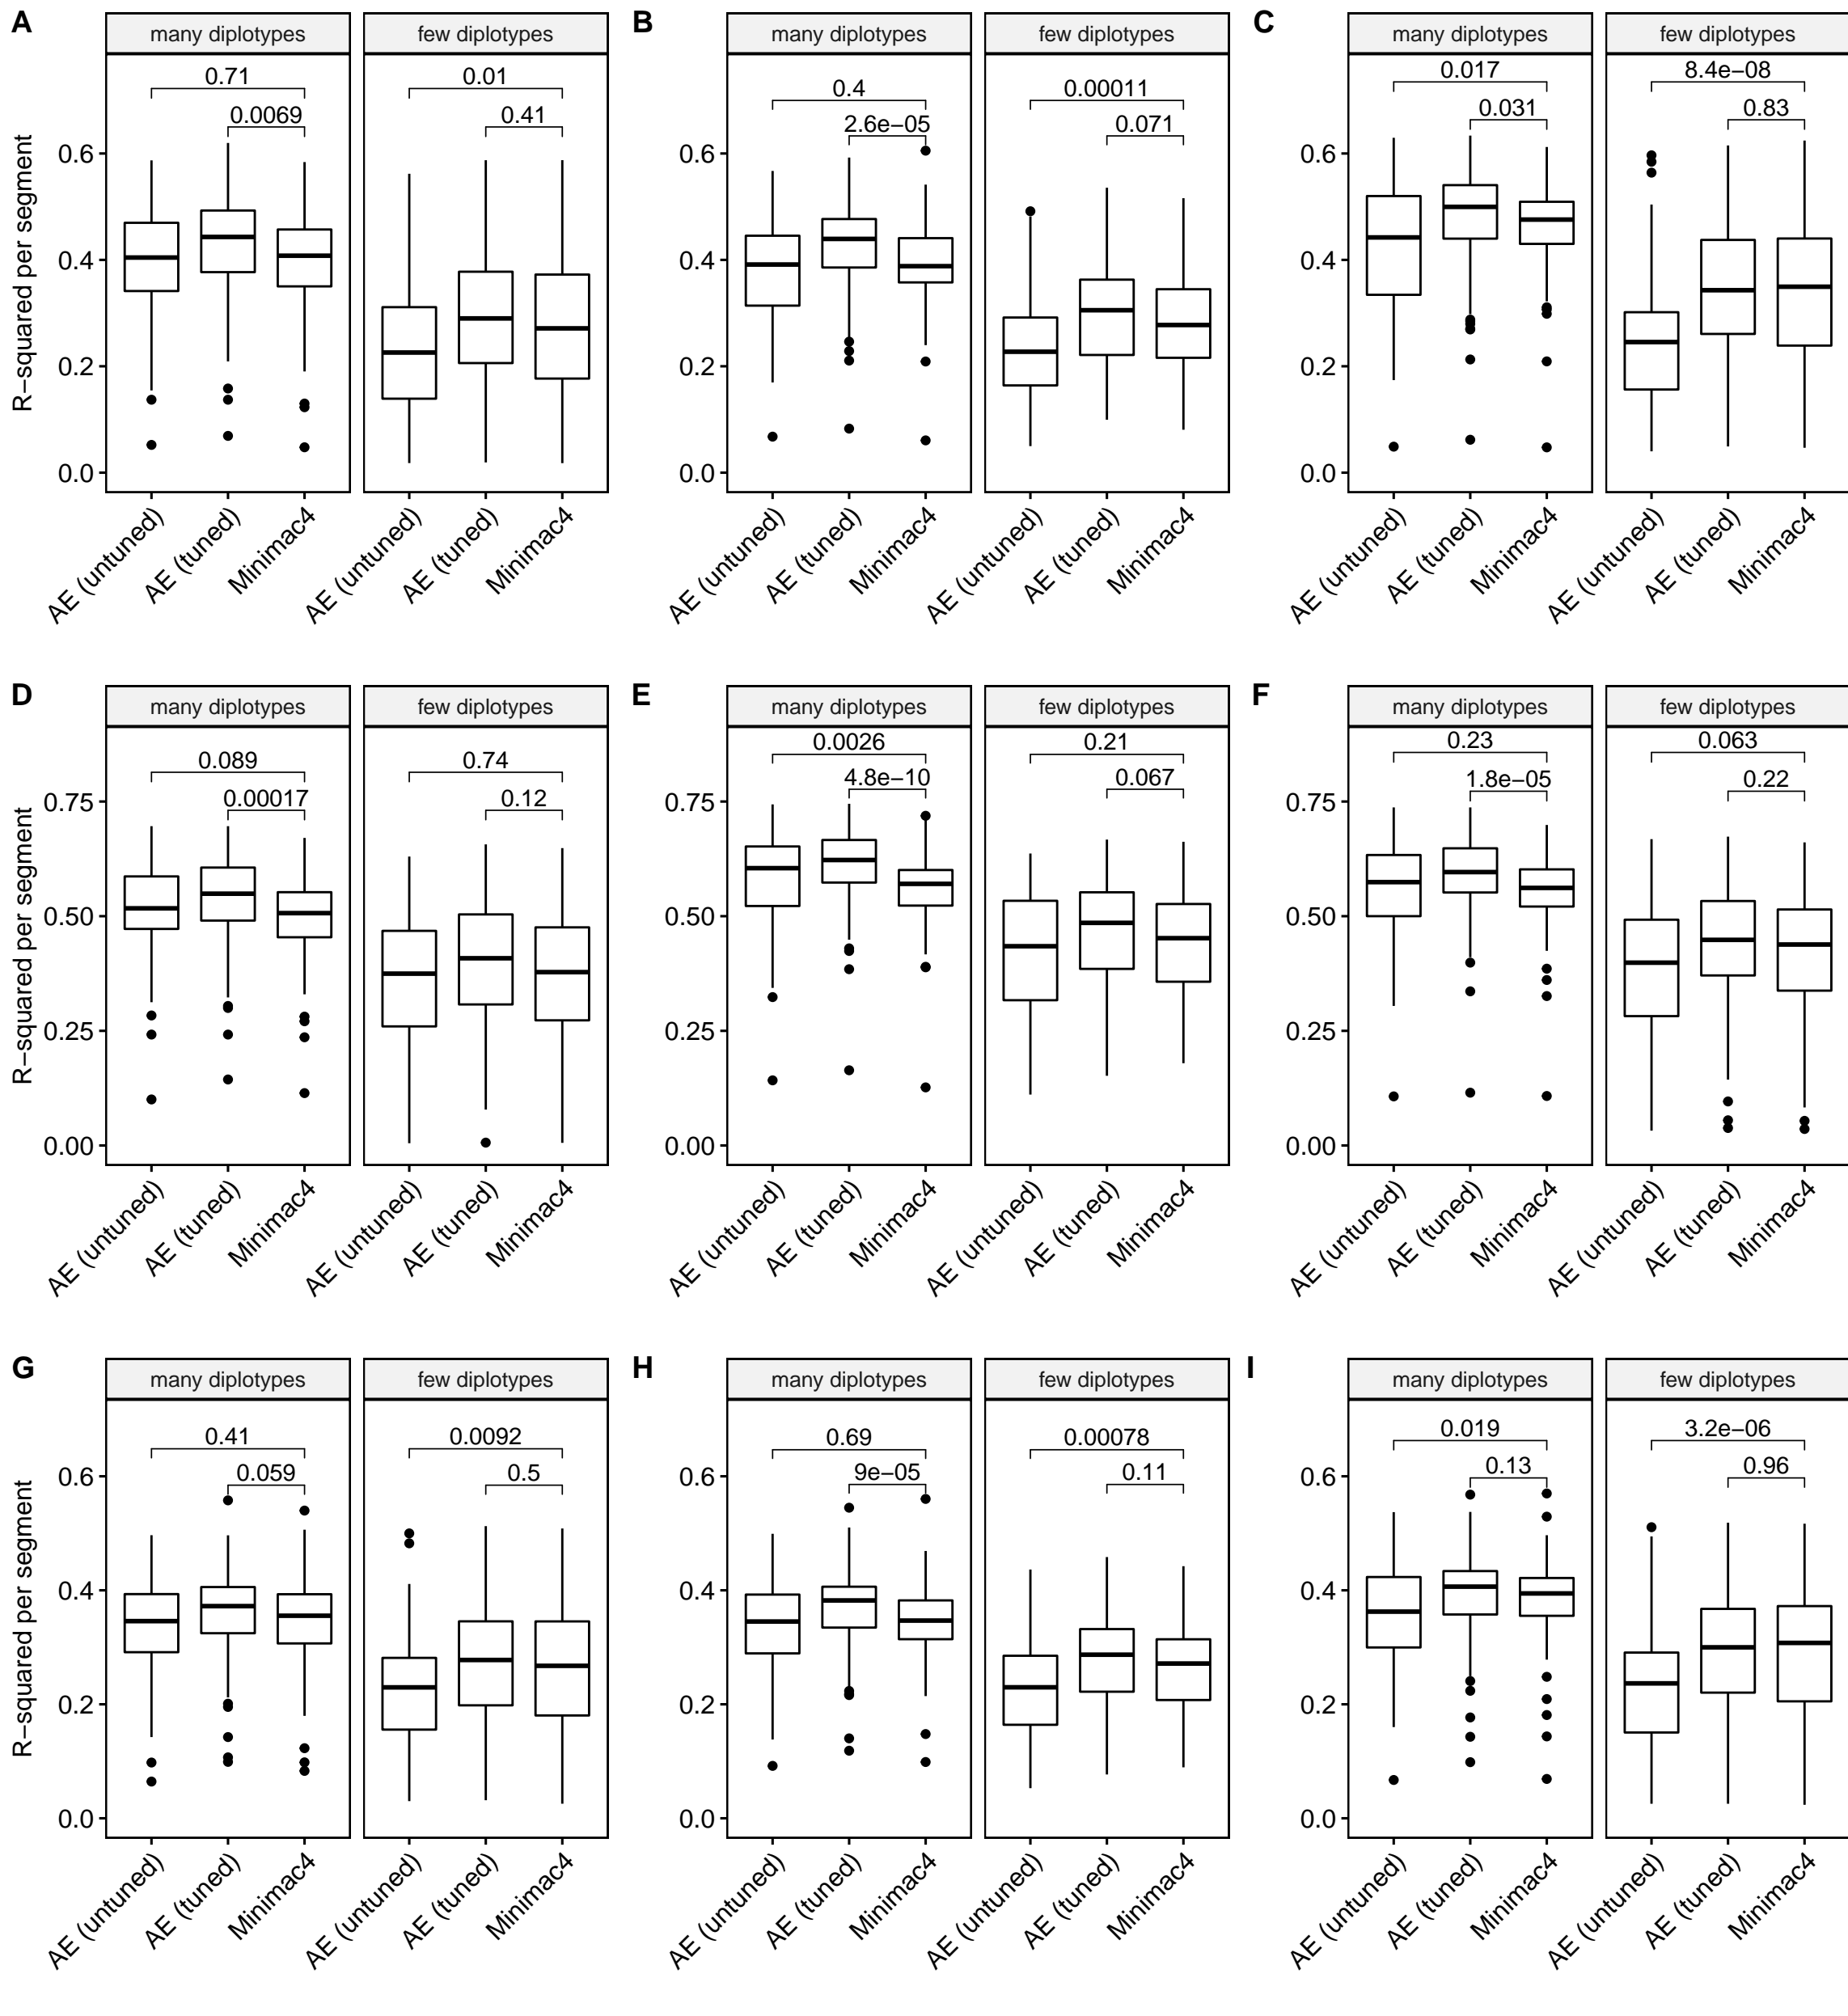

Supplement: supp [file elife-75600-supp-v1.zip]

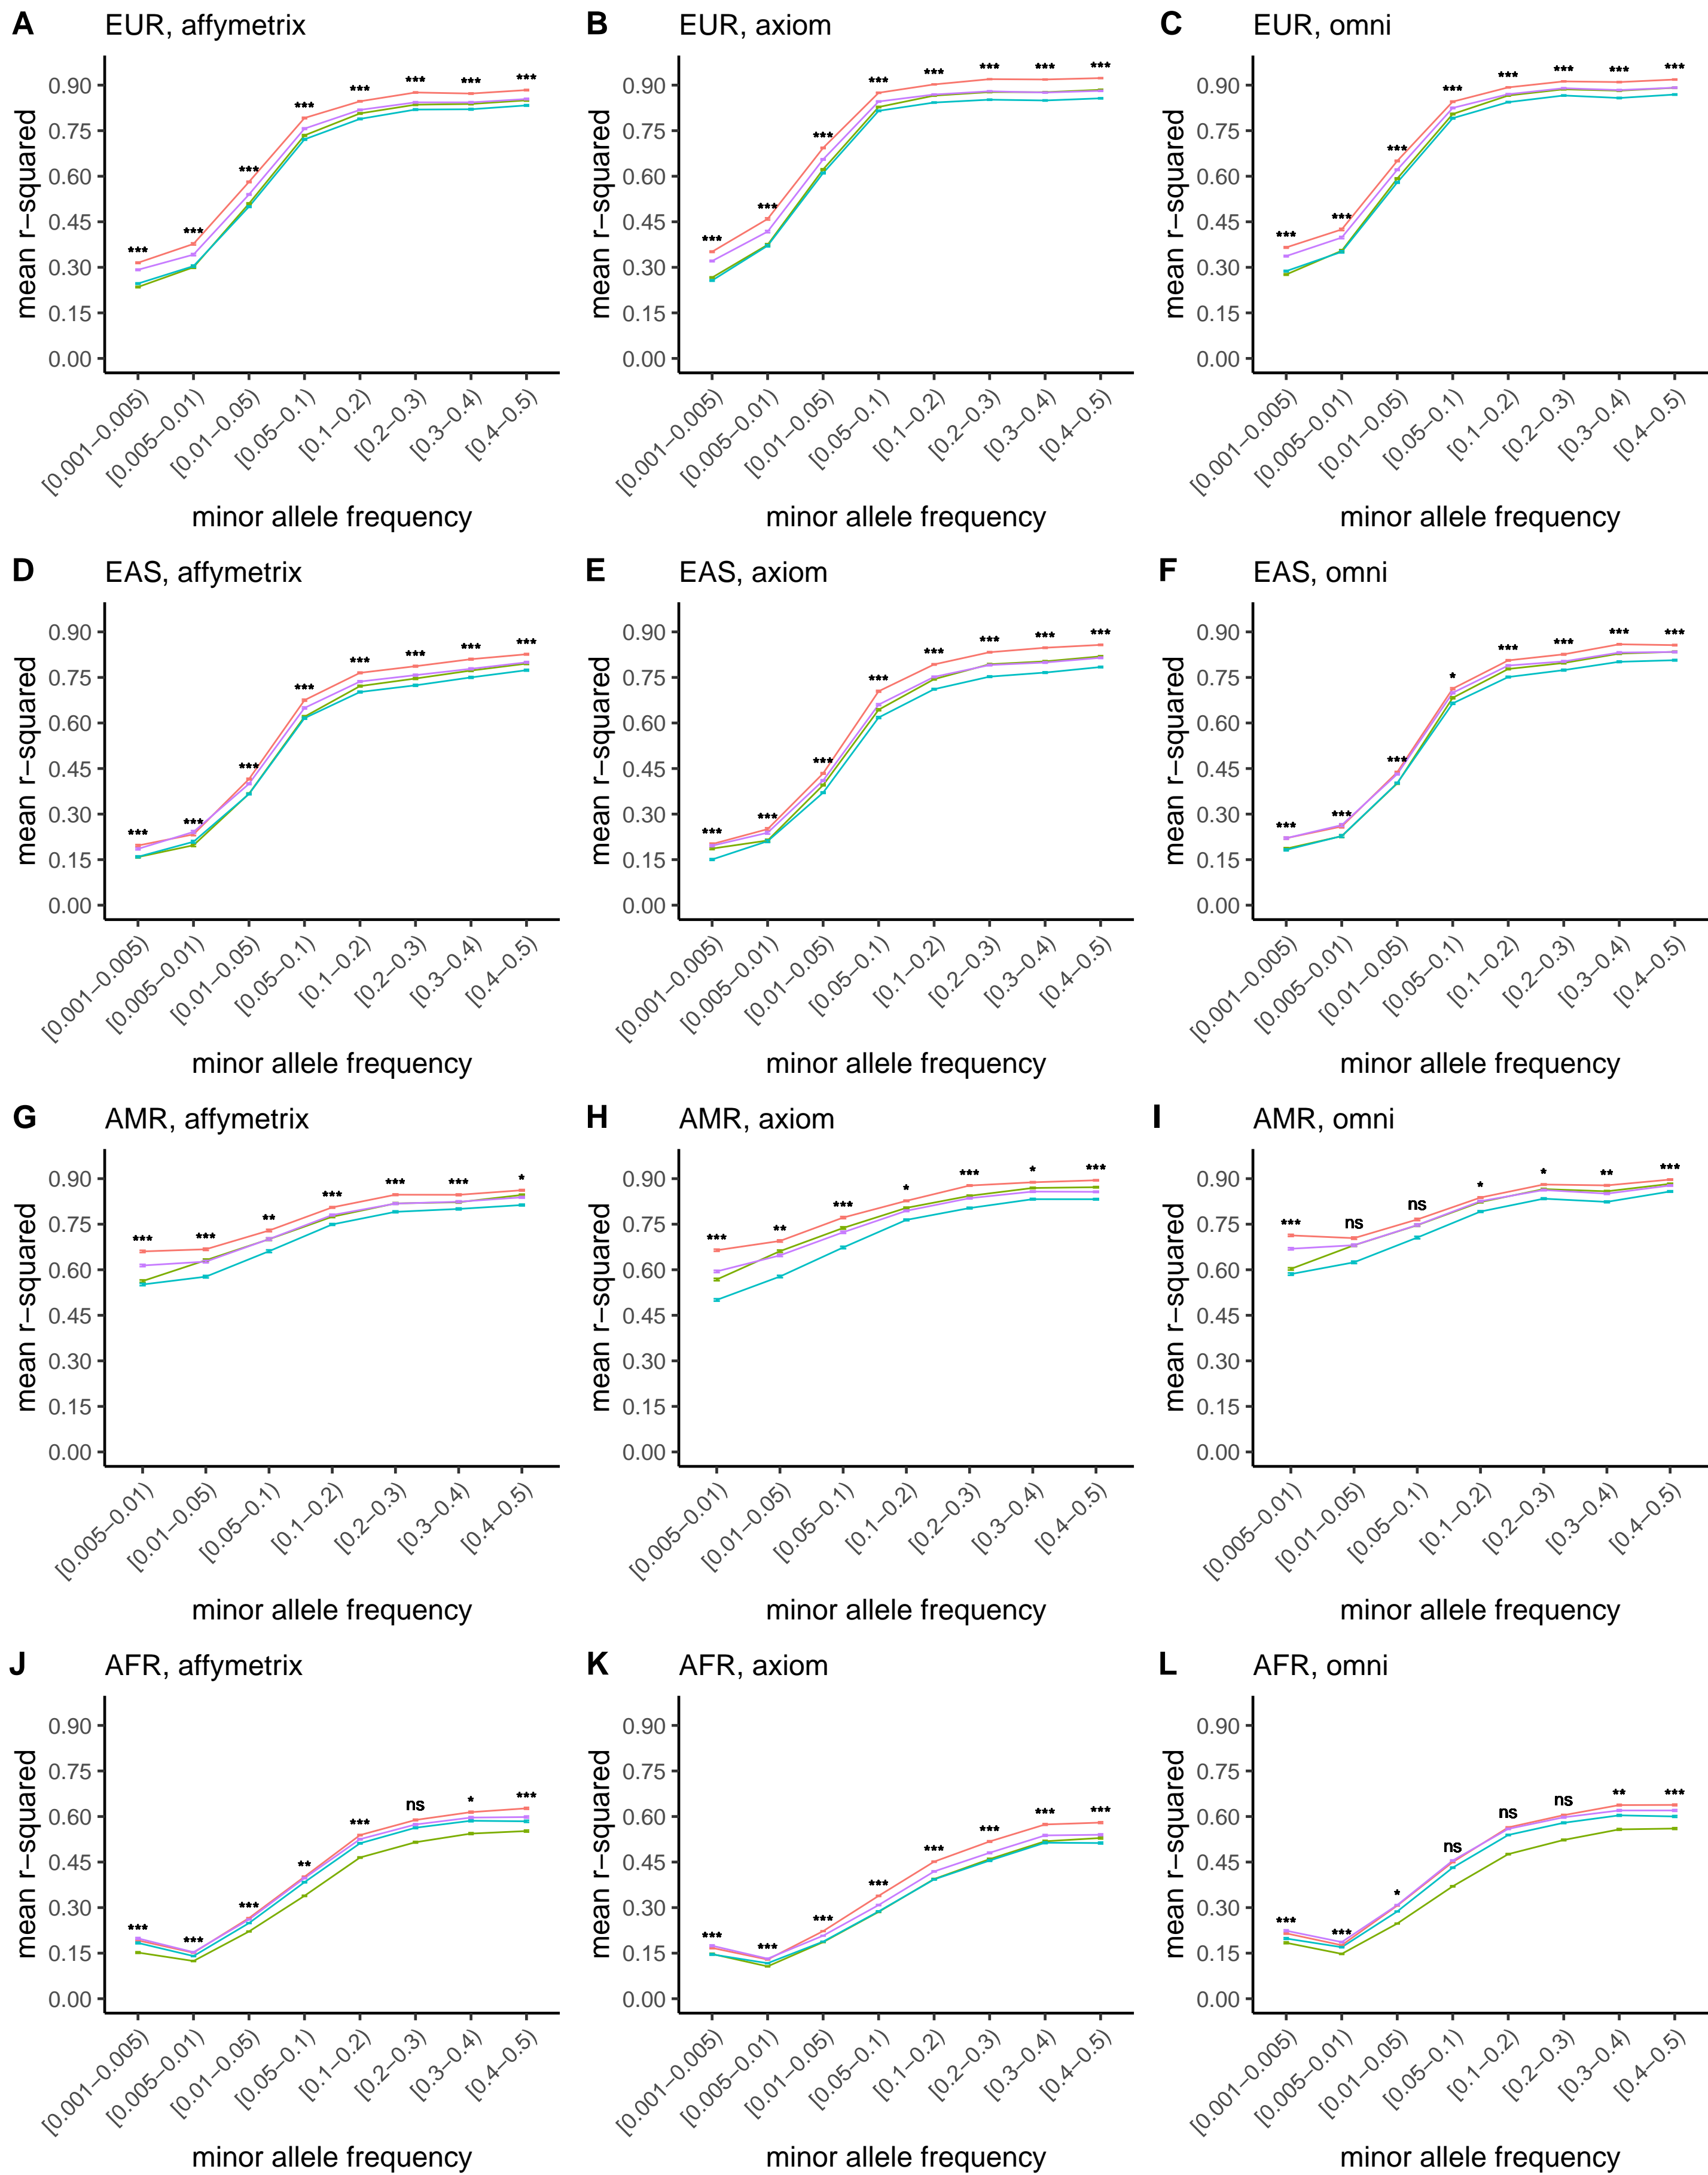

Supplement: supp [file elife-75600-supp-v1.zip]

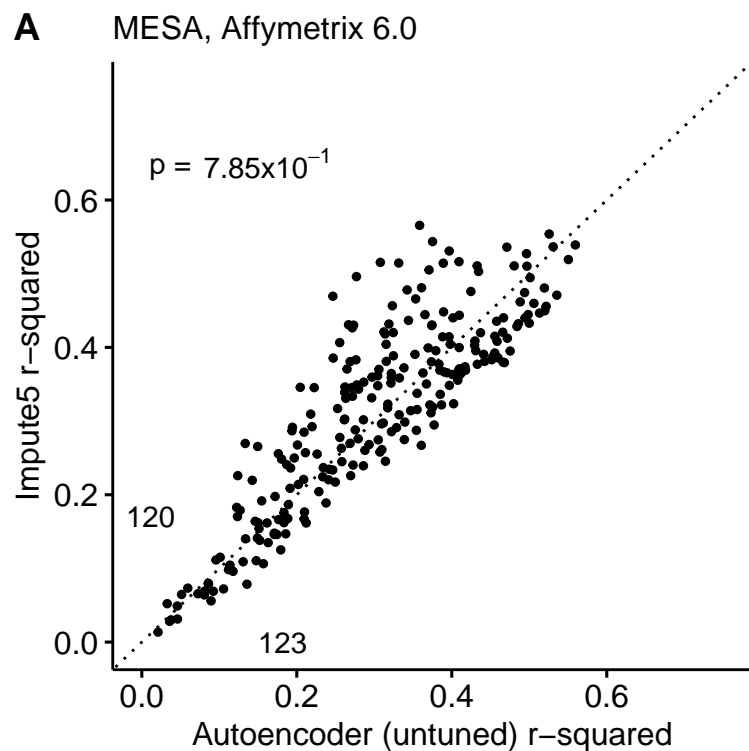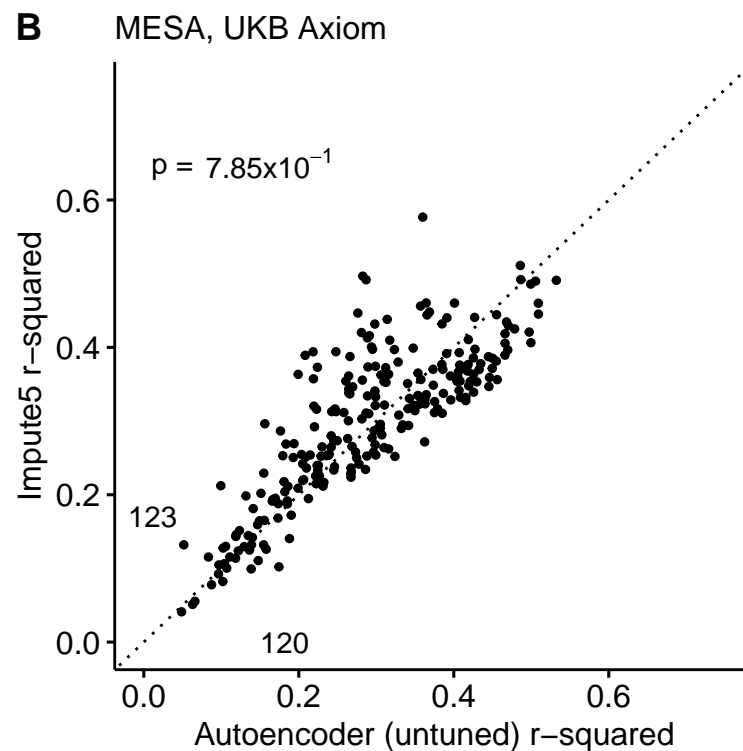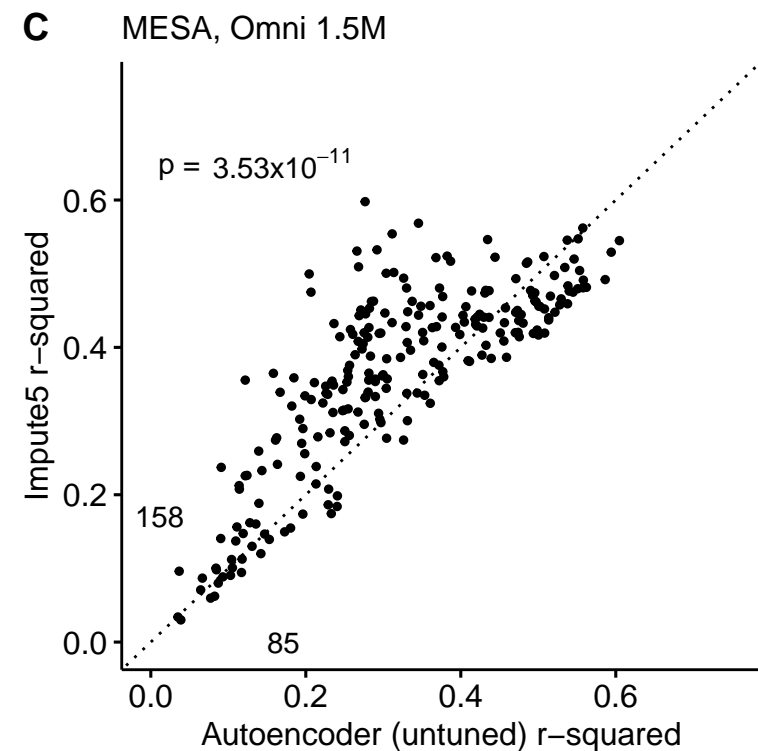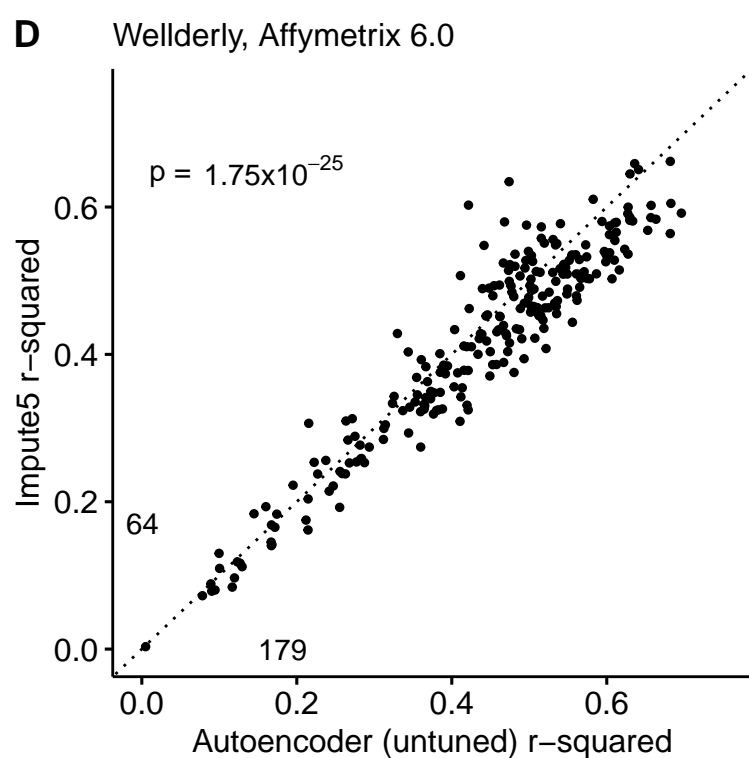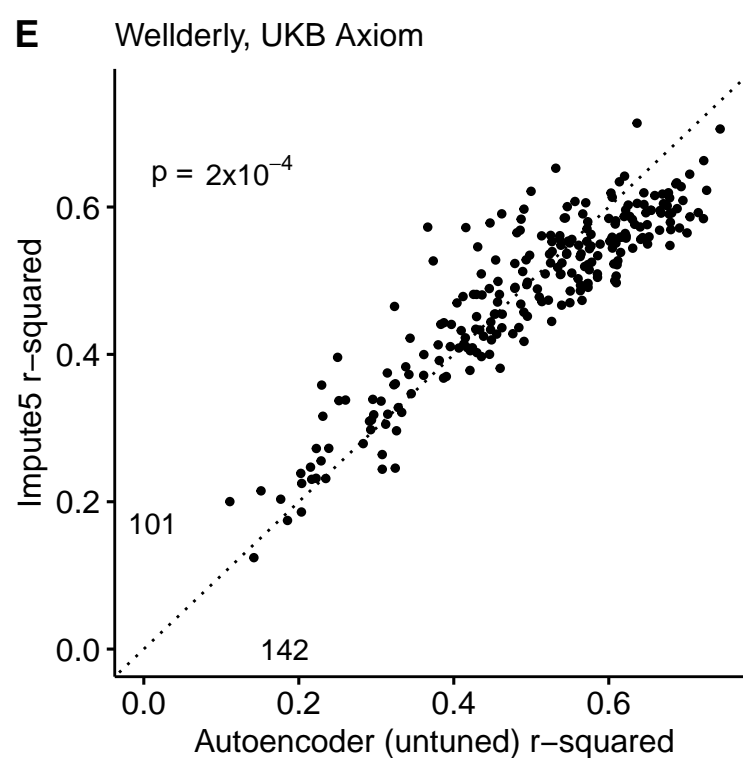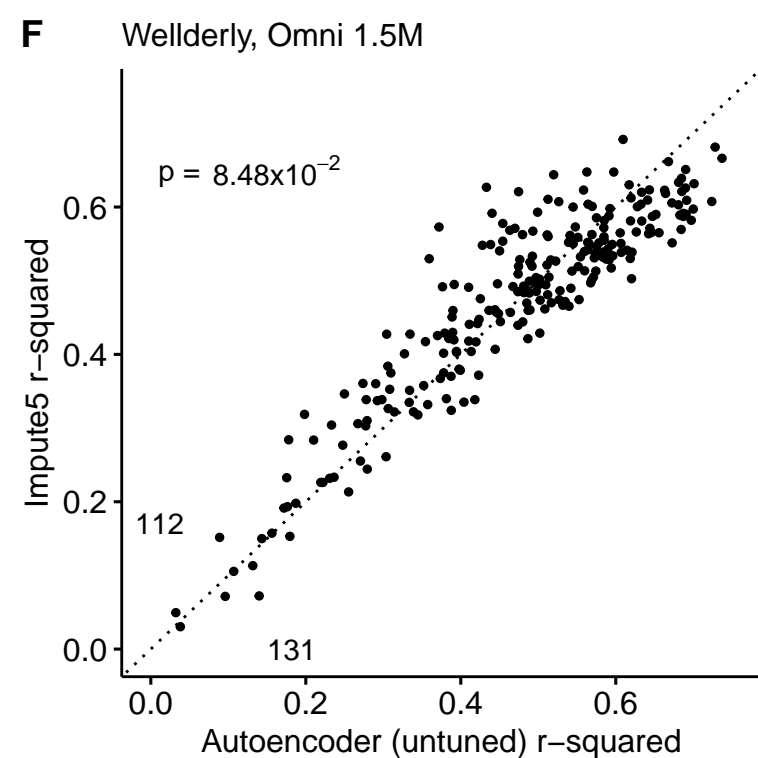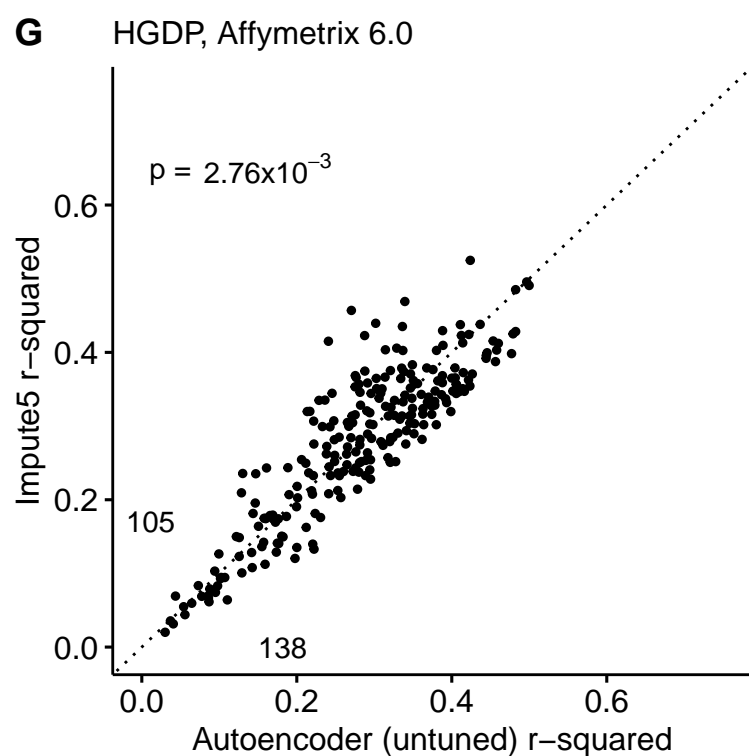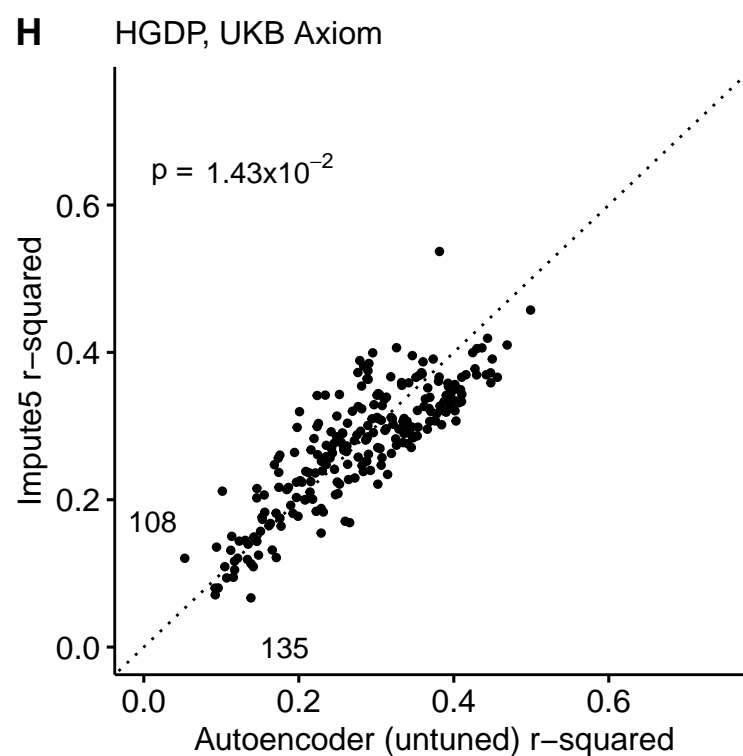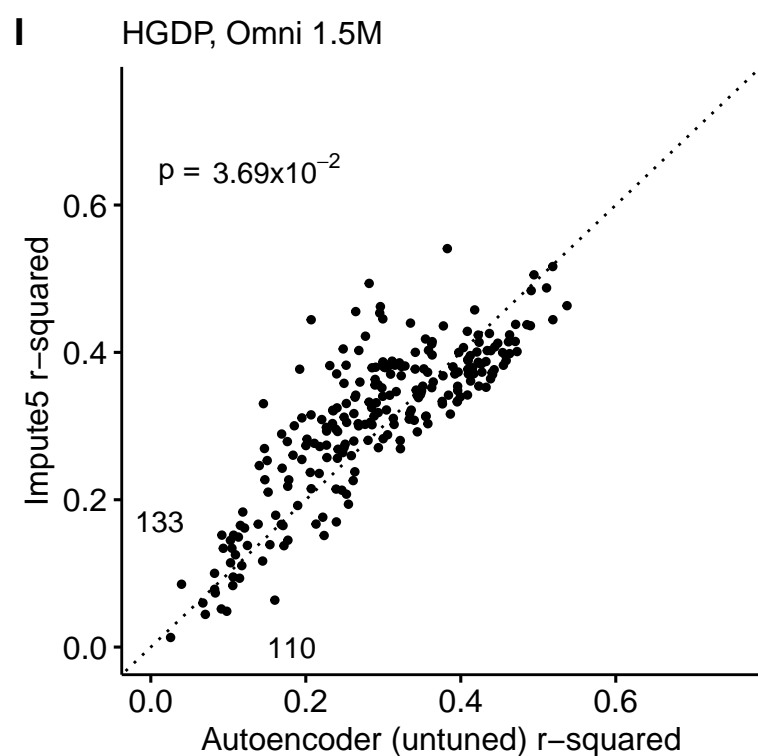

Supplement: supp [file elife-75600-supp-v1.zip]
